# Supplementary material
Source: PubMed Central journal article supplement (PMC8805281)
Supplement: NIHMS1771771-supplement-Supplemental_Tables_and_Figures.pdf [file NIHMS1771771-supplement-Supplemental_Tables_and_Figures.pdf]

# A Reversed Phase Ultra-High-Performance Liquid Chromatography-Data Independent Mass Spectrometry Method for the Rapid Identification of Mycobacterial Lipids

Isin T. Sakallioğlu,<sup>1</sup> Amith S. Maroli,<sup>1,2</sup> Aline De Lima Liete,<sup>1,2</sup> and Robert Powers<sup>1,2,\*</sup>

<sup>1</sup>*Department of Chemistry, University of Nebraska-Lincoln, Lincoln NE 68588-0304*

<sup>2</sup>*Nebraska Center for Integrated Biomolecular Communication, University of Nebraska-Lincoln, Lincoln NE 68588-0304*

## Content:

## Figures:

- Figure S1.** Chemical structures and predicted properties for (A)  $\alpha$ -mycolic acid and (B) methoxy cis mycolic acid.
- Figure S2.** Height equivalent to a theoretical plate versus flow rate plots for different sized ultra-high-performance liquid chromatography columns.
- Figure S3.** Direct-injection mass spectrometry-mass spectrometry spectrum of  $\alpha$ -mycolic acid.
- Figure S4.** Mass spectrometry elevated collision energy spectrum of methoxy cis mycolic acid.
- Figure S5.** Mass spectrometry elevated collision energy spectrum of  $\alpha$ -mycolic acid.
- Figure S6.** Ultra-high-performance liquid chromatography-quadrupole time of flight-mass spectrometry chromatogram of the mixture of the EquiSPLASH™ standard and mycolic acids.
- Figure S7.** Extracted ion chromatogram of (A) methoxy cis mycolic acid and (B)  $\alpha$ -mycolic acid.
- Figure S8.** Bar plots of (A) the number of PubMed papers published per year containing the keywords: mycolic acid, liquid chromatography, and mass spectrometry, and (B) the runtimes of the published liquid-chromatography-mass spectrometry methods for mycobacterial lipidomics studies.

## Tables:

- Table S1.** Summary of Liquid-Chromatography-Mass Spectrometry Data for Standard Lipids

**Table S2.** Peak Widths and Retention Times for Lipids from the Standard Mixture

**Table S3.** Summary of Column Resolution

**Table S4.** Summary of Spectral Features for the Four Liquid-Chromatography-Mass Spectrometry Methods

**Table S5.** Summary of the Statistical Analysis of the Four Liquid-Chromatography-Mass Spectrometry Methods

**Table S6.** Retention Times Obtained for Lipids from the Standard Mixture for Each Liquid-Chromatography-Mass Spectrometry Method

**Table S7.** Lipid Retention Times Identified by Each of the Four Liquid-Chromatography-Mass Spectrometry Methods

## **References**

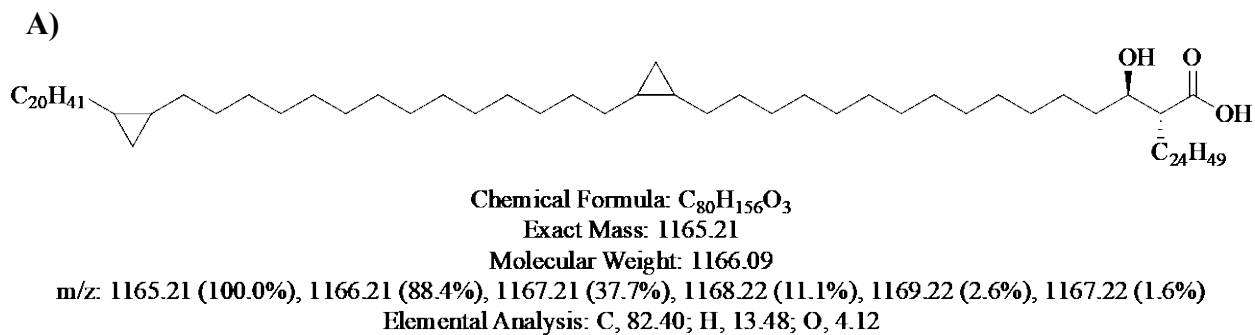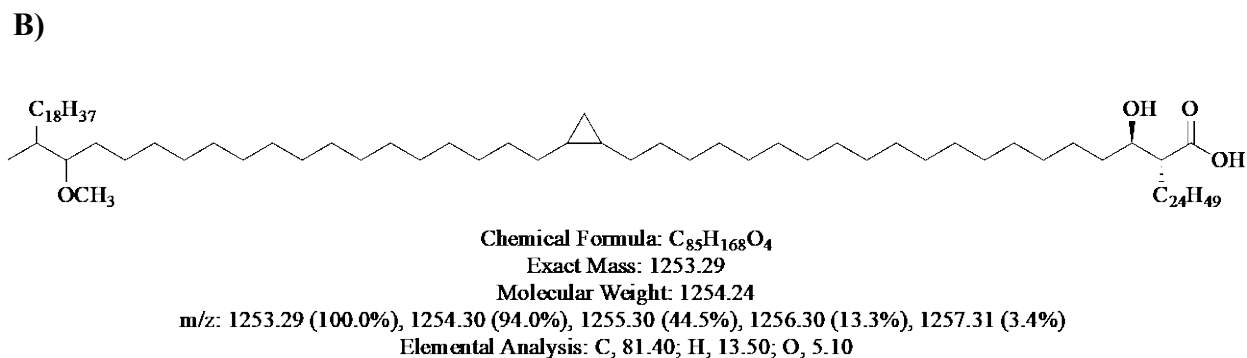

**Figure S1.** Chemical structures and predicted properties for **(A)**  $\alpha$ -mycolic acid and **(B)** methoxy cis mycolic acid. ChemDraw v19.1 (PerkinElmer, Waltham, MA) was used to generate chemical structures and to predict chemical and mass spectrometry parameters, which included theoretical isotopic distribution.

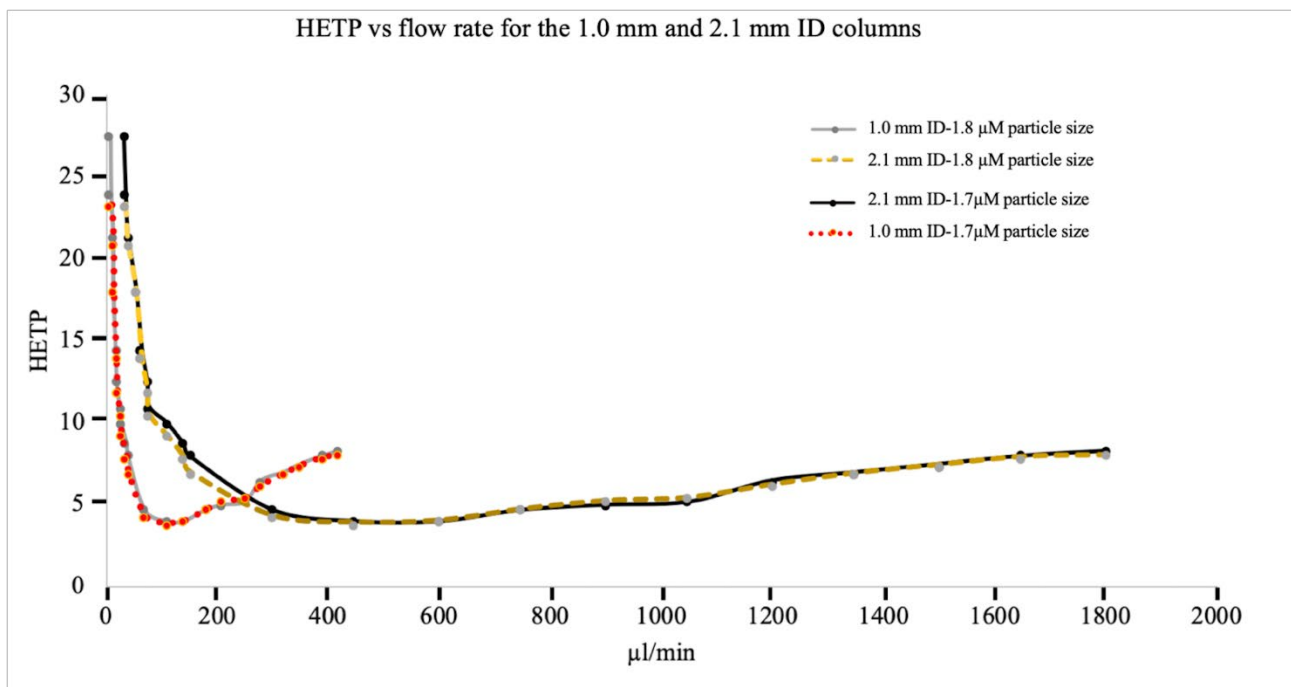

**Figure S2.** Height equivalent to a theoretical plate versus flow rate plots for different sized ultra-high-performance liquid chromatography columns. The plots correspond to 1 mm and 2.1 mm internal diameter ultra-high-performance liquid chromatography columns with 1.7 or 1.8  $\mu\text{m}$  particle sizes. The particle sizes correspond to the charged surface hybrid and high strength silica columns, respectively. These plots were generated from available literature data [1-4].

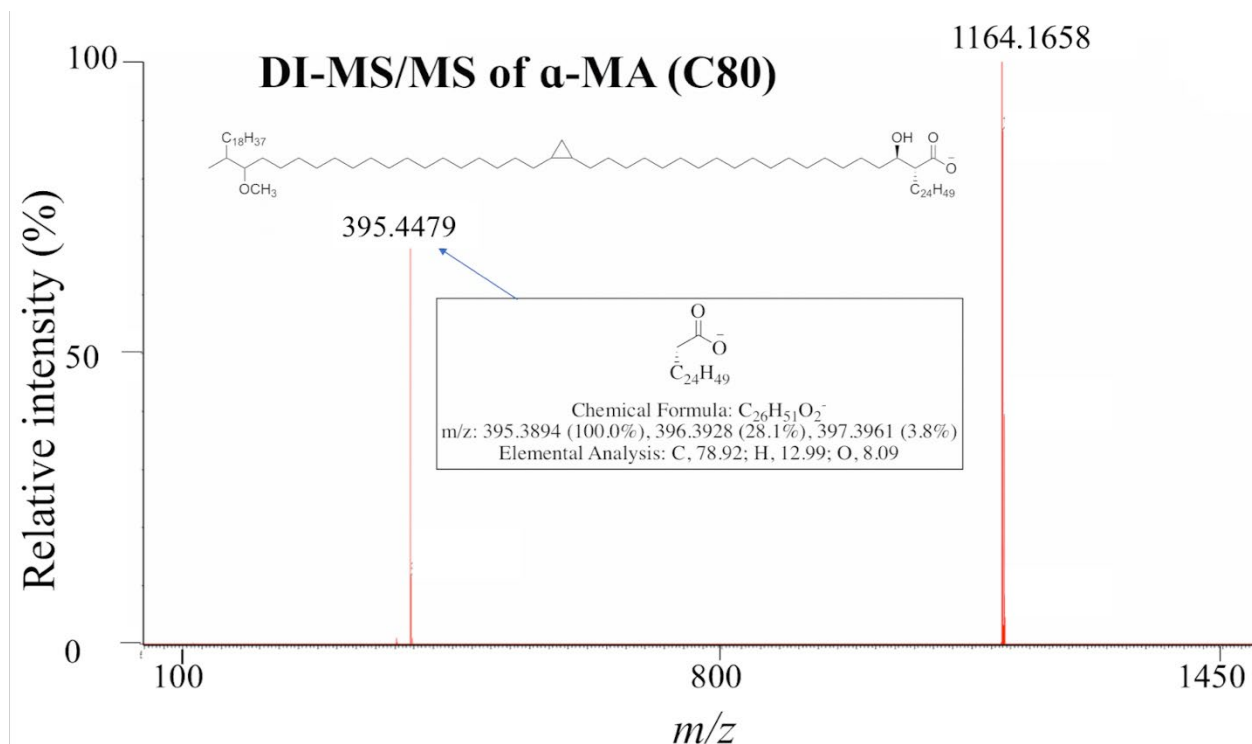

**Figure S3.** Direct-injection mass spectrometry-mass spectrometry spectrum of  $\alpha$ -mycolic acid. The spectrum highlights the daughter ion at  $m/z$ :395, which provides information regarding the  $R_2$  side chain length. The daughter ion is labeled with a chemical structure and mass spectrometry parameters predicted from ChemDraw v19.1 (PerkinElmer, Waltham, MA), which includes the theoretical isotopic distribution. The full structure of  $\alpha$ -mycolic acid is shown as an insert. Abbreviations: DI-MS/MS: direct-injection mass spectrometry-mass spectrometry;  $\alpha$ -MA:  $\alpha$ -mycolic acid; C80: chain-length of 80 carbons.

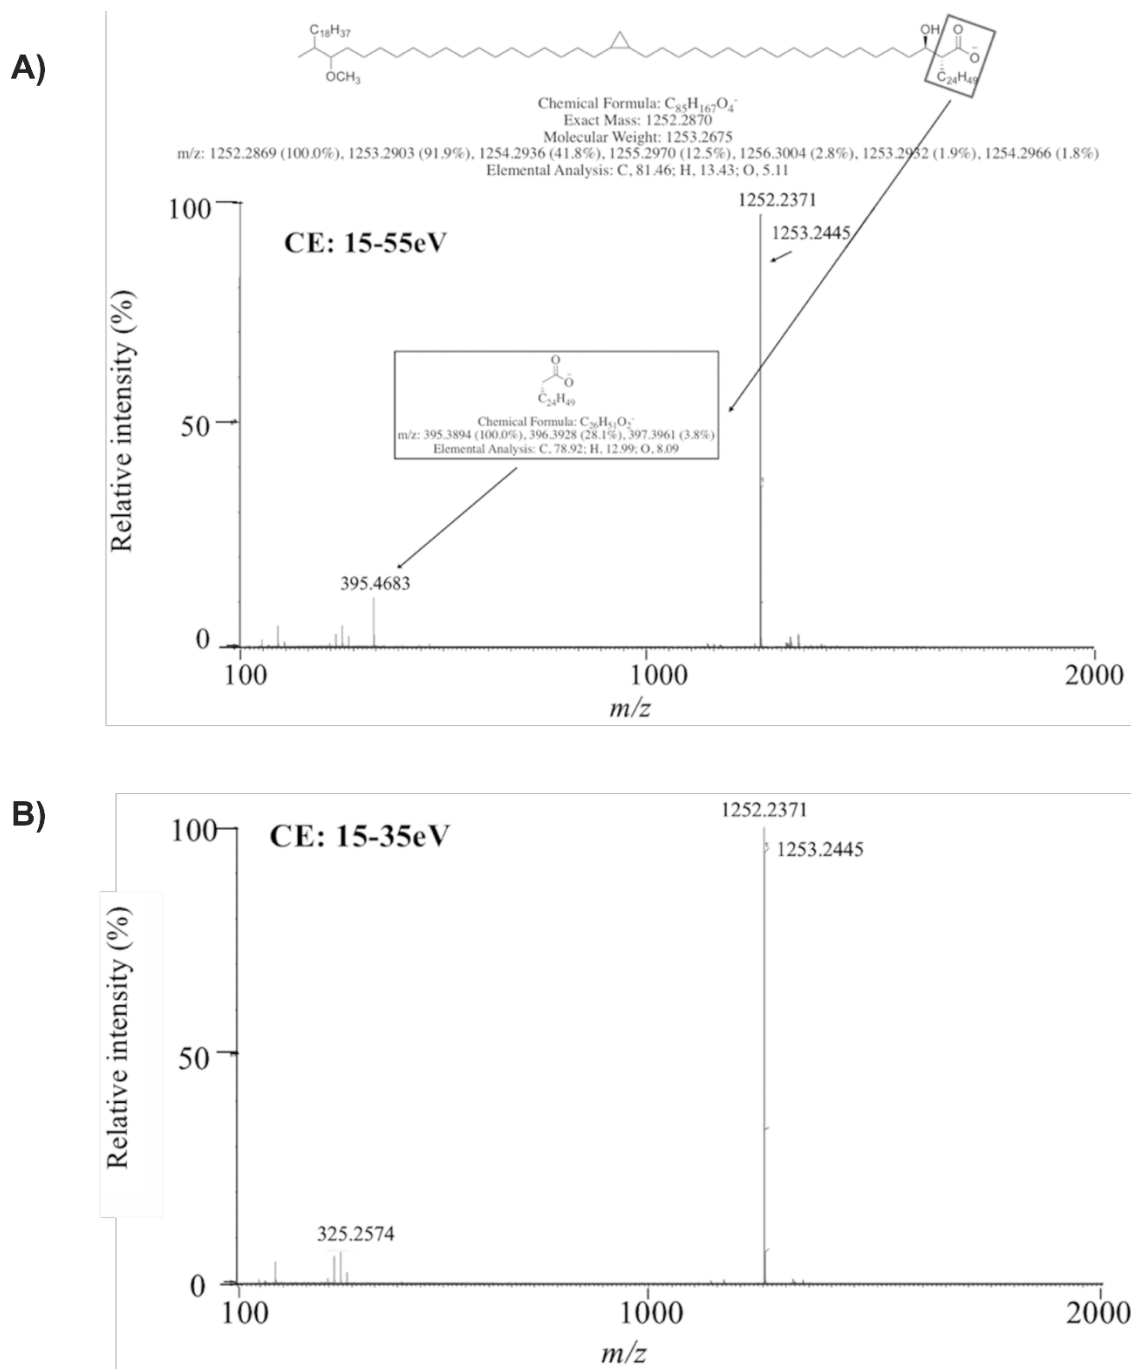

**Figure S4.** Mass spectrometry elevated collision energy spectrum of methoxy cis mycolic acid. The mass spectrometry elevated collision energy spectra were collected at a collision energy ramp of **(A)** 15 to 55eV, which highlighted the expected  $m/z$ :395 fragment that provides information regarding the  $R_2$  side chain length and **(B)** 15 to 35eV, which lacks the daughter ion at  $m/z$ :395. The daughter ion is labeled with a chemical structure and mass spectrometry parameters predicted from ChemDraw v19.1 (PerkinElmer, Waltham, MA), which includes the theoretical isotopic distribution. The full structure of methoxy cis mycolic acid is shown as an insert. Abbreviations: CE: collision energy.

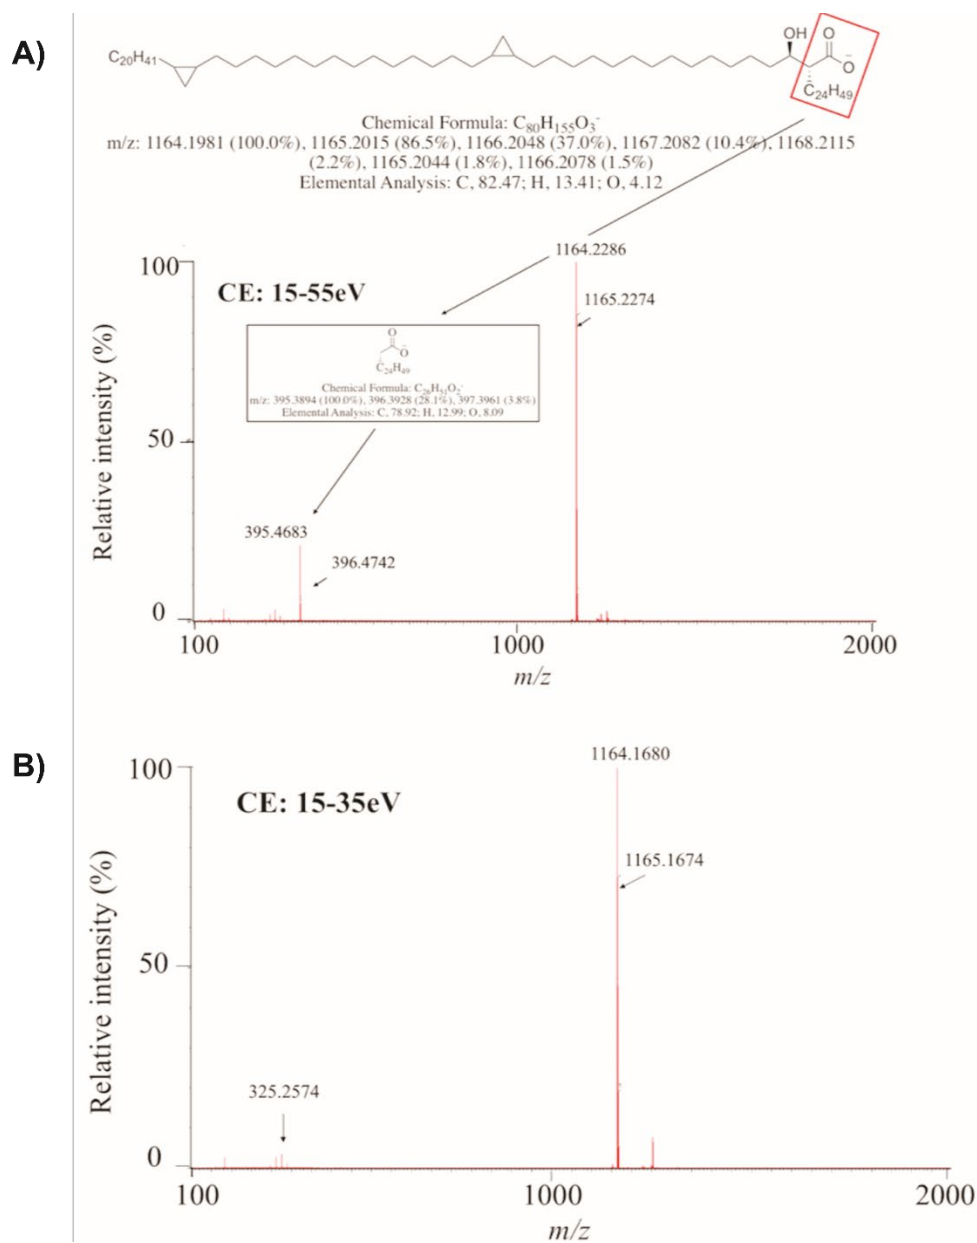

**Figure S5.** Mass spectrometry elevated collision energy spectrum of  $\alpha$ -mycolic acid. The mass spectrometry elevated collision energy spectra were collected at a collision energy ramp of **(A)** 15 to 55eV, which highlighted the expected  $m/z$ :395 fragment that provides information regarding the  $R_2$  side chain length and **(B)** 15 to 35eV, which lacks the daughter ion at  $m/z$ :395. The daughter ion is labeled with a chemical structure and mass spectrometry parameters predicted from ChemDraw v19.1 (PerkinElmer, Waltham, MA), which includes the theoretical isotopic distribution. The full structure and scaffold of  $\alpha$ -mycolic acid is shown as an insert. Abbreviations: CE: collision energy.

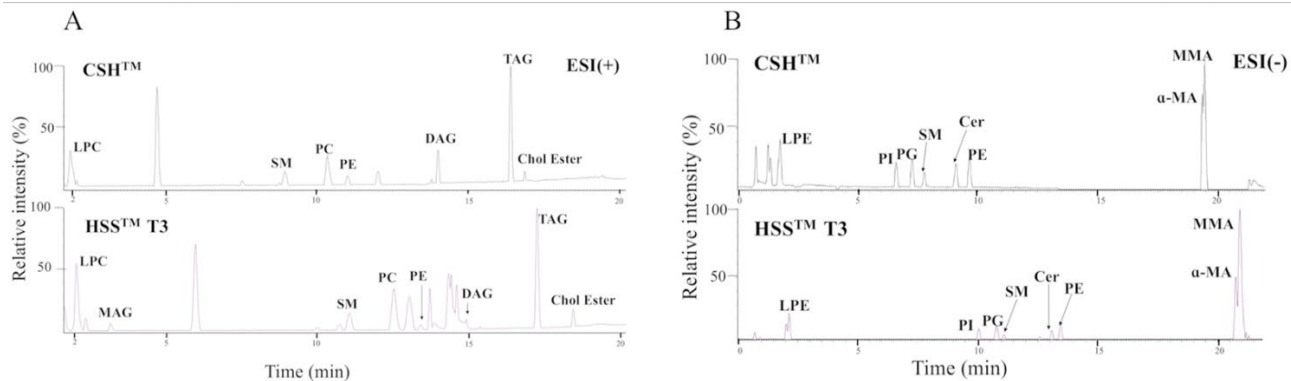

**Figure S6.** Ultra-high-performance liquid chromatography-quadrupole time of flight-mass spectrometry chromatogram of the mixture of the EquiSPLASH™ standard and mycolic acids. The chromatogram obtained in the **(A)** positive ionization mode. The analytes were separated in 22 minutes on a Acquity ultra-high-performance liquid chromatography system with a (*top*) charged surface hybrid column or (*bottom*) high strength silica column with acetonitrile/water (60/40, v/v), 10 mM of ammonium formate and 0.1% formic acid (Solvent A), and 2-propanol/acetonitrile (90/10, v/v) with 10 mM of ammonium formate and 0.1% formic acid (Solvent B). The chromatogram obtained in the **(B)** negative ionization mode. The analytes were separated in 14 minutes on an Acquity ultra-high-performance liquid chromatography system with a (*top*) charged surface hybrid column or (*bottom*) high strength silica column with acetonitrile/water (60/40, v/v), 10 mM of ammonium formate and 0.1% formic acid (Solvent A), and 2-propanol/acetonitrile (90/10, v/v) with 10 mM of ammonium formate and 0.1% formic acid (Solvent B).



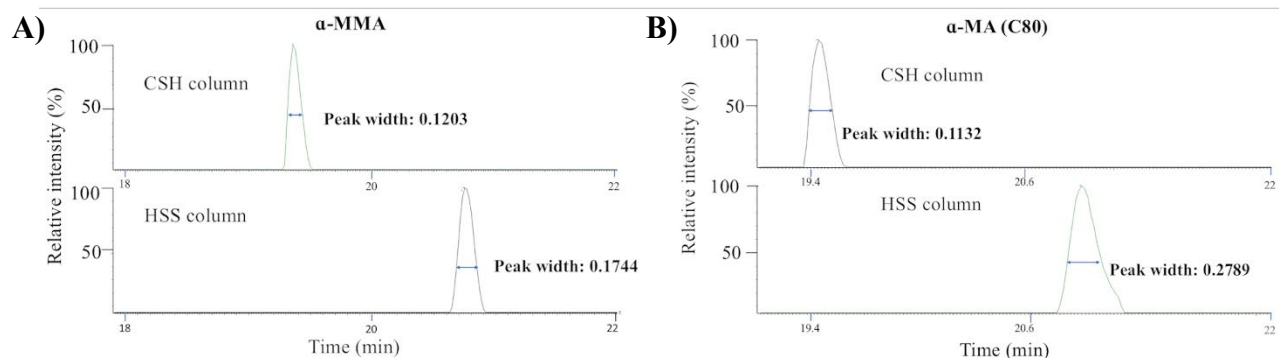

**Figure S7.** Extracted ion chromatogram of **A)** methoxy cis mycolic acid and **B)**  $\alpha$ -mycolic acid. The extracted ion chromatograms highlight the peak widths on the (*top*) charged surface hybrid column or (*bottom*) high strength silica column with a 22-minute gradient elution using mobile phase A: acetonitrile/water (60/40, v/v), 10 mM of ammonium formate and 0.1% formic acid, and mobile phase B: 2-propanol/acetonitrile (90/10, v/v), with 10 mM of ammonium formate and 0.1% formic acid. Abbreviations: HSS, high strength silica; CSH, charged surface hybrid;  $\alpha$ -MMA, methoxy cis mycolic acid;  $\alpha$ -MA,  $\alpha$ -mycolic acid; C80: chain-length of 80 carbons.

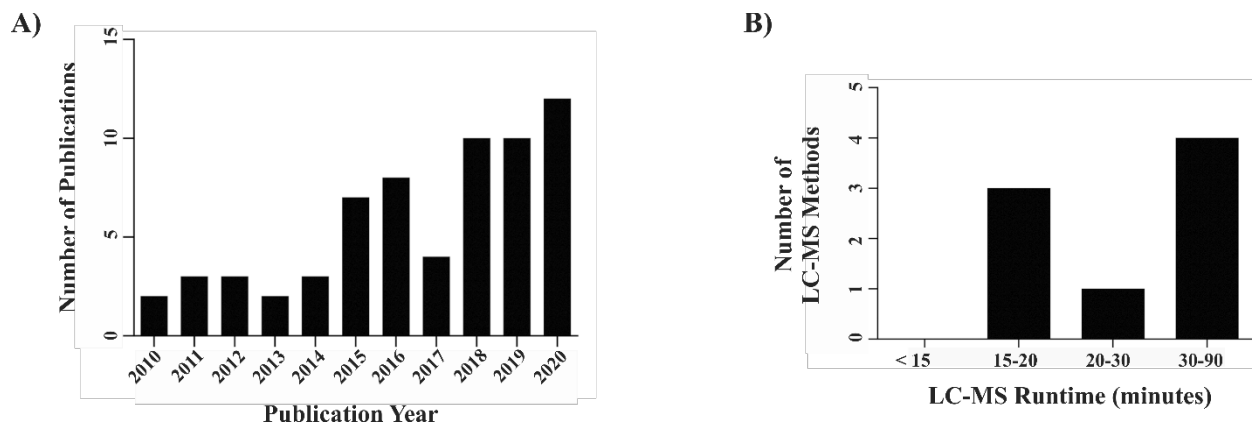

**Figure S8.** Bar plots of (A) the number of PubMed papers published per year containing the keywords: mycolic acid, liquid chromatography, and mass spectrometry, and (B) the runtimes of the published liquid chromatography-mass spectrometry methods for mycobacterial lipidomics studies. Abbreviations: LC-MS: liquid-chromatography-mass spectrometry

**Table S1. Summary of Liquid Chromatography-Mass Spectrometry Data for Standard Lipids**

| Analyte <sup>a</sup>                   | Accurate Mass <sup>b</sup> | Expected $m/z$ <sup>c</sup>                   | Observed $m/z$ <sup>d</sup> |                    |                                                                     | R.T <sup>e</sup> | Fragments ( $m/z$ ) (15-55eV) <sup>f</sup>      |
|----------------------------------------|----------------------------|-----------------------------------------------|-----------------------------|--------------------|---------------------------------------------------------------------|------------------|-------------------------------------------------|
|                                        |                            |                                               | [M+H] <sup>+</sup>          | [M-H] <sup>-</sup> | Other adduct with $m/z$                                             |                  |                                                 |
| 15:0-18:1(d7) PC                       | 752.6061                   | [M+H] <sup>+</sup><br>753.6134                | 753.6500                    | NA                 | [M+HCOO] <sup>-</sup> 797.6603                                      | 7.03             | 184.0829                                        |
| 18:1(d7) Lyso PC                       | 528.3921                   | [M+H] <sup>+</sup><br>529.3994                | 529.4276                    | NA                 | [M+HCOO] <sup>-</sup> 573.4567                                      | 1.60             | 184.0829                                        |
| 15:0-18:1(d7) PE                       | 710.5998                   | [M+H] <sup>+</sup><br>711.5634                | 711.5839                    | 709.5873           | NA                                                                  | 7.41             | 288.368; 241.2884                               |
| 18:1(d7) Lyso PE                       | 486.3451                   | [M+H] <sup>+</sup><br>487.3524                | 487.3642                    | 485.4087           | NA                                                                  | 1.64             | 288.368                                         |
| 15:0-18:1(d7)PG                        | 741.5537                   | [M-H] <sup>-</sup><br>740.5464                | NA                          | 740.5747           | NA                                                                  | 6.02             | 288.368; 325.2563; 377.2825;<br>311.2412        |
| 15:0-18:1(d7) PI                       | 829.5698                   | [M-H] <sup>-</sup><br>828.5798                | NA                          | 828.5798           | NA                                                                  | 5.63             | 288.368; 241.2884; 539.3309;<br>377.2825        |
| 15:0-18:1(d7) PS                       | 754.5490                   | [M+H] <sup>+</sup><br>755.5562                | 755.5645                    | NA                 | NA                                                                  | 7.43             | 570.5732;<br>711.5966                           |
| 15:0-18:1(d7)-15:0<br>TAG              | 811.7646                   | [M+NH <sub>4</sub> ] <sup>+</sup><br>829.7985 | NA                          | NA                 | [M+NH <sub>4</sub> ] <sup>+</sup><br>829.8103                       | 9.56             | 570.5473; 523.498; 355.0883;<br>281.0632        |
| 15:0-18:1(d7) DAG                      | 587.5506                   | [M+NH <sub>4</sub> ] <sup>+</sup><br>605.5884 | NA                          | NA                 | [M+NH <sub>4</sub> ] <sup>+</sup><br>605.5966                       | 8.39             | 570.5732;<br>495.2889;<br>346.3519;<br>311.3161 |
| 18:1(d7) MAG                           | 363.3366                   | [M+H] <sup>+</sup><br>364.3429                | 364.3488                    | NA                 | [M+Na] <sup>+</sup><br>386.3327                                     | 2.16             | 328.2567                                        |
| 18:1(d7) Chol Ester                    | 657.6441                   | [M+NH <sub>4</sub> ] <sup>+</sup><br>675.6779 | NA                          | NA                 | [M+Na] <sup>+</sup><br>680.6644                                     | 9.78             | 579.5624; 369.3717; 551.5365                    |
| d18:1-18:1(d9) SM                      | 737.6397                   | [M+H] <sup>+</sup><br>738.6470                | 738.6642                    | NA                 | [M+Na] <sup>+</sup><br>760.6395 &<br>[M+HCOO] <sup>-</sup> 782.6973 | 6.22             | 577.5937; 701.5889                              |
| C15 Ceramide-d7                        | 530.5404                   | [M+H] <sup>+</sup><br>531.5477                | 531.5612                    | NA                 | [M+HCOO] <sup>-</sup><br>575.6102 & [M+Na] <sup>+</sup><br>553.5405 | 7.15             | 271.3281; 289.3423;<br>513.5599                 |
| $\alpha$ -mycolic acid<br>(C80)        | 1165.205                   | [M-H] <sup>-</sup><br>1164.093                | NA                          | 1164.1680          | [M+Na] <sup>+</sup><br>1188.1850                                    | 10.9             | 395.4683                                        |
| $\alpha$ -mycolic acid,<br>methoxy cis | 1253.2904                  | [M-H] <sup>-</sup><br>1252.241                | NA                          | 1252.2371          | [M+Na] <sup>+</sup><br>1276.2723                                    | 10.8             | 395.4683                                        |

<sup>a</sup>Lipid analytes in the mixture of Equisplash and two mycolic acids.<sup>b</sup>Accurate mass of the lipids in the mixture<sup>c</sup>Expected  $m/z$  values of the lipid in the mixture.<sup>d</sup>Observed  $m/z$  with the indicated adduct.<sup>e</sup>Retention time on a charged surface hybrid column with a 14-minute elution gradient<sup>f</sup>Fragment ions observed in 15 to 55 eV

**Table S2.** Peak Widths and Retention Times for Lipids from the Standard Mixture<sup>a</sup>

| Lipid Name                         | Accurate Mass | HS22-LFR              |                               | CS22-LFR              |                               |
|------------------------------------|---------------|-----------------------|-------------------------------|-----------------------|-------------------------------|
|                                    |               | Rt (min)<br>(Mean±SD) | Peak Width (min)<br>(Mean±SD) | Rt (min)<br>(Mean±SD) | Peak Width (min)<br>(Mean±SD) |
| 15:0-18:1(d7) PC                   | 752.6061      | 12.5235±0.008         | 0.5026±0.001                  | 10.3275±0.008         | 0.51415±0.034                 |
| 18:1(d7) Lyso PC                   | 528.3921      | 2.024±0.009           | 0.4457±0.026                  | 1.878±0.000           | 0.3884±0.0118                 |
| <b>15:0-18:1(d7) PE</b>            | 710.5998      | 13.45±0.010           | 0.3234±0.011                  | 10.02±0.35            | 0.2866±0.001                  |
| <b>18:1(d7) Lyso PE</b>            | 486.3451      | 2.1375±0.003          | 0.2817±0.001                  | 1.809±0.051           | 0.2651±0.009                  |
| <b>15:0-18:1(d7) PG</b>            | 741.5537      | 10.765±0.015          | 0.36265±0.014                 | 7.535±0.275           | 0.31605±0.026                 |
| <b>15:0-18:1(d7) PI</b>            | 829.5698      | 10.035±0.005          | 0.3531±0.011                  | 6.79±0.18             | 0.253±0.011                   |
| 15:0-18:1(d7) PS                   | 754.549       | 10.453±0.039          | 0.5764±0.007                  | N/O                   | N/O                           |
| 15:0-18:1(d7)-15:0 TAG             | 811.7646      | 17.25±0.000           | 0.22205±0.001                 | 16.3835±0.009         | 0.2153±0.005                  |
| 15:0-18:1(d7) DAG                  | 587.5506      | 14.591±0.000          | 0.246±0.002                   | 13.9905±0.000         | 0.2097±0.000                  |
| 18:1(d7) MAG                       | 363.3366      | 3.1735±0.009          | 0.28085±0                     | 2.6585±0.009          | 0.29385±0.000                 |
| 18:1(d7) Chol Ester                | 657.6441      | 18.455±0              | 0.2065±0.002                  | 16.84±0.000           | 0.1619±0.000                  |
| d18:1-18:1(d9) SM                  | 737.6397      | 11.0485±0.009         | 0.4368±0.004                  | 8.895±0.000           | 0.3817±0.009                  |
| <b>C15 Ceramide-d7</b>             | 530.5404      | 13.0385±0.009         | 0.3094±0.010                  | 9.102±0.009           | 0.2641±0.003                  |
| <b>α-mycolic acid (C80)</b>        | 1165.205      | 20.755±0.165          | 0.26225±0.087                 | 19.455±0.005          | 0.1807±0.002                  |
| <b>α-mycolic acid, methoxy cis</b> | 1253.2904     | 20.63±0.120           | 0.1964±0.038                  | 19.37±0.001           | 0.1922±0.002                  |

<sup>a</sup>Lipids that were observed and reported in the negative ionization mode are in bold font; N/O: not observed

**Table S3.** Summary of Column Resolution

|                      | Column Type and Runtime |               |               |
|----------------------|-------------------------|---------------|---------------|
|                      | CSH-14 minutes          | CS-22 minutes | HS-22 minutes |
| <b>MA Resolution</b> | 0.99 ± 0.06             | 0.8 ± 0.2     | 0.97 ± 0.01   |

**Table S4.** Summary of Spectral Features for the Four Liquid Chromatography-Mass Spectrometry Methods

|                                       | Method    |           |           |           |
|---------------------------------------|-----------|-----------|-----------|-----------|
|                                       | CS-14 LFR | HS-30 LFR | HS-22 HFR | HS-25 LFR |
| <b>Number of features</b>             | 5436      | 8066      | 4682      | 3730      |
| <b>Average of the raw intensities</b> | 5.66E+04  | 1.79E+04  | 6.63E+03  | 8.44E+03  |
| <b>Median raw intensity</b>           | 2.85E+03  | 2.69E+03  | 6.43E+02  | 8.13E+02  |
| <b>Standard deviation</b>             | 2.66E+05  | 8.59E+04  | 5.90E+04  | 6.56E+04  |

**Table S5.** Summary of the Statistical Analysis of the Four Liquid Chromatography-Mass Spectrometry Methods

|                                       | Method    |           |           |           |
|---------------------------------------|-----------|-----------|-----------|-----------|
|                                       | CS-14 LFR | HS-30 LFR | HS-22 HFR | HS-25 LFR |
| <b>Number of Identified lipids</b>    | 308       | 334       | 229       | 133       |
| <b>Average of the raw intensities</b> | 1.50E+05  | 3.5E+04   | 3.7E+04   | 5.6E+04   |
| <b>Median raw intensity</b>           | 2.7E+03   | 4.9E+03   | 1.3E+03   | 3.4E+03   |
| <b>Standard deviation</b>             | 7.5E+05   | 1.7E+05   | 2.4E+05   | 3.2E+05   |

**Table S6.** Retention Times Obtained for Lipids from the Standard Mixture for Each Liquid Chromatography-Mass Spectrometry Method<sup>a</sup>

| Lipid Name                         | Methods compared |          |          |          |
|------------------------------------|------------------|----------|----------|----------|
|                                    | CS14-LFR         | HS25-LFR | HS22-HFR | HS30-LFR |
| 15:0-18:1(d7) PC                   | 7.03             | 18.2     | N/O      | 8.5      |
| 18:1(d7) Lyso PC                   | 1.6              | 12.2     | 12.2     | 2.3      |
| <b>15:0-18:1(d7) PE</b>            | 7.41             | N/O      | 15.5     | 8.9      |
| <b>18:1(d7) Lyso PE</b>            | 1.64             | 11.5     | 12.1     | 2.4      |
| <b>15:0-18:1(d7)PG</b>             | 6.02             | N/O      | N/O      | 7.2      |
| <b>15:0-18:1(d7) PI</b>            | 5.63             | 15.8     | N/O      | 7.0      |
| 15:0-18:1(d7) PS                   | 7.43             | N/O      | N/O      | 7.8      |
| 15:0-18:1(d7)-15:0 TAG             | 9.56             | N/O      | N/O      | 18.3     |
| 15:0-18:1(d7) DAG                  | 8.39             | N/O      | N/O      | 11.5     |
| 18:1(d7) MAG                       | 2.16             | N/O      | N/O      | 6.1      |
| 18:1(d7) Chol Ester                | 9.78             | N/O      | N/O      | 19.1     |
| d18:1-18:1(d9) SM                  | 6.22             | N/O      | N/O      | 7.5      |
| <b>C15 Ceramide-d7</b>             | 7.15             | N/O      | N/O      | 8.0      |
| <b>α-mycolic acid (C80)</b>        | 10.9             | N/O      | N/O      | 23.7     |
| <b>α-mycolic acid, methoxy cis</b> | 10.8             | N/O      | N/O      | 23.9     |

<sup>a</sup>Lipids that were observed and reported in the negative ionization mode are in bold font; N/O: not observed

**Table S7.** Lipid Retention Times Identified by Each of the Four Liquid Chromatography-Mass Spectrometry Methods<sup>a</sup>

| <b>LipidID</b> | <b>HS22-HFR<br/>RT (min)</b> | <b>CS14-LFR<br/>RT (min)</b> | <b>HS30-LFR<br/>RT (min)</b> | <b>HS25-LFR<br/>RT (min)</b> |
|----------------|------------------------------|------------------------------|------------------------------|------------------------------|
| Ac1PIM1(46:1)  | 14.26                        | N/O                          | 15.87                        | N/O                          |
| Ac1PIM1(46:2)  | 16.77                        | N/O                          | N/O                          | N/O                          |
| Ac1PIM1(47:1)  | 18.72                        | N/O                          | 5.20                         | N/O                          |
| Ac1PIM1(47:2)  | 17.49                        | N/O                          | N/O                          | N/O                          |
| Ac1PIM1(48:1)  | N/O                          | N/O                          | 16.56                        | N/O                          |
| Ac1PIM1(48:2)  | 17.86                        | N/O                          | N/O                          | 20.20                        |
| Ac1PIM1(48:3)  | 16.79                        | 10.91                        | N/O                          | N/O                          |
| Ac1PIM1(48:3)  | N/O                          | N/O                          | N/O                          | N/O                          |
| Ac1PIM1(48:4)  | N/O                          | 9.43                         | N/O                          | N/O                          |
| Ac1PIM1(49:2)  | N/O                          | 7.72                         | N/O                          | N/O                          |
| Ac1PIM1(49:2)  | N/O                          | N/O                          | 8.20                         | N/O                          |
| Ac1PIM1(49:4)  | 17.21                        | 9.53                         | N/O                          | N/O                          |
| Ac1PIM1(50:2)  | N/O                          | N/O                          | 8.42                         | N/O                          |
| Ac1PIM1(50:3)  | 17.86                        | 7.59                         | N/O                          | N/O                          |
| Ac1PIM1(50:5)  | 18.09                        | N/O                          | N/O                          | N/O                          |
| Ac1PIM1(51:2)  | N/O                          | 8.09                         | N/O                          | N/O                          |
| Ac1PIM1(51:3)  | 18.65                        | N/O                          | 18.67                        | 21.47                        |
| Ac1PIM1(51:4)  | 18.52                        | N/O                          | N/O                          | N/O                          |
| Ac1PIM1(51:5)  | N/O                          | 9.56                         | N/O                          | N/O                          |
| Ac1PIM1(52:2)  | 16.33                        | 6.98                         | 10.52                        | N/O                          |
| Ac1PIM1(52:3)  | 19.84                        | N/O                          | N/O                          | N/O                          |
| Ac1PIM1(52:5)  | 18.62                        | 6.10                         | N/O                          | N/O                          |
| Ac1PIM1(53:2)  | N/O                          | 6.98                         | N/O                          | N/O                          |
| Ac1PIM1(53:3)  | 19.84                        | N/O                          | N/O                          | N/O                          |
| Ac1PIM1(53:4)  | N/O                          | N/O                          | 18.09                        | N/O                          |
| Ac1PIM1(53:5)  | 17.09                        | 6.69                         | 18.00                        | 18.69                        |

|               |       |       |       |       |
|---------------|-------|-------|-------|-------|
| Ac1PIM1(54:3) | 16.99 | 8.29  | N/O   | N/O   |
| Ac1PIM1(55:1) | N/O   | 10.43 | 7.19  | N/O   |
| Ac1PIM1(55:2) | N/O   | N/O   | 4.42  | N/O   |
| Ac1PIM1(55:4) | 17.84 | N/O   | N/O   | 20.23 |
| Ac1PIM1(55:5) | 15.68 | N/O   | 8.14  | N/O   |
| Ac1PIM1(56:1) | N/O   | N/O   | 7.40  | N/O   |
| Ac1PIM1(56:3) | 20.00 | N/O   | N/O   | N/O   |
| Ac1PIM1(56:4) | 19.40 | N/O   | N/O   | 20.20 |
| Ac1PIM1(57:1) | N/O   | 12.55 | 8.20  | 20.89 |
| Ac1PIM1(57:2) | N/O   | N/O   | 7.26  | N/O   |
| Ac1PIM1(57:3) | N/O   | N/O   | 6.81  | N/O   |
| Ac1PIM1(57:4) | 19.35 | N/O   | N/O   | N/O   |
| Ac1PIM1(C44)  | N/O   | N/O   | 16.00 | N/O   |
| Ac1PIM1(C45)  | 14.72 | N/O   | N/O   | N/O   |
| Ac1PIM1(C46)  | 14.77 | N/O   | 6.13  | N/O   |
| Ac1PIM1(C47)  | 18.91 | N/O   | 6.59  | N/O   |
| Ac1PIM1(C48)  | N/O   | N/O   | 17.14 | 22.32 |
| Ac1PIM1(C49)  | N/O   | 10.52 | N/O   | N/O   |
| Ac1PIM1(C51)  | N/O   | 10.63 | N/O   | N/O   |
| Ac1PIM1(C52)  | N/O   | 10.63 | N/O   | N/O   |
| Ac1PIM1(C53)  | 17.49 | 10.21 | 8.66  | N/O   |
| Ac1PIM1(C55)  | N/O   | N/O   | 19.37 | N/O   |
| Ac1PIM1(C56)  | N/O   | N/O   | 8.77  | N/O   |
| Ac1PIM2(46:1) | 18.11 | N/O   | N/O   | N/O   |
| Ac1PIM2(46:2) | N/O   | 6.69  | N/O   | N/O   |
| Ac1PIM2(48:1) | N/O   | N/O   | N/O   | 19.94 |
| Ac1PIM2(48:2) | N/O   | 7.67  | N/O   | N/O   |
| Ac1PIM2(48:4) | 18.16 | N/O   | N/O   | N/O   |
| Ac1PIM2(49:1) | N/O   | N/O   | 8.90  | 21.62 |
| Ac1PIM2(49:2) | 19.60 | N/O   | N/O   | N/O   |

|               |       |       |       |     |
|---------------|-------|-------|-------|-----|
| Ac1PIM2(49:4) | N/O   | 7.62  | 18.95 | N/O |
| Ac1PIM2(50:1) | 13.29 | N/O   | 8.85  | N/O |
| Ac1PIM2(50:4) | N/O   | 10.19 | N/O   | N/O |
| Ac1PIM2(51:3) | N/O   | 8.02  | N/O   | N/O |
| Ac1PIM2(51:4) | N/O   | N/O   | 19.13 | N/O |
| Ac1PIM2(51:5) | N/O   | 7.67  | N/O   | N/O |
| Ac1PIM2(52:3) | N/O   | 8.09  | N/O   | N/O |
| Ac1PIM2(52:4) | N/O   | 12.15 | N/O   | N/O |
| Ac1PIM2(53:1) | N/O   | N/O   | 15.60 | N/O |
| Ac1PIM2(53:2) | N/O   | 8.33  | 20.16 | N/O |
| Ac1PIM2(53:3) | N/O   | N/O   | 21.97 | N/O |
| Ac1PIM2(53:4) | N/O   | 8.03  | N/O   | N/O |
| Ac1PIM2(54:1) | N/O   | N/O   | 20.31 | N/O |
| Ac1PIM2(54:2) | N/O   | 8.38  | 19.00 | N/O |
| Ac1PIM2(54:3) | N/O   | 10.02 | N/O   | N/O |
| Ac1PIM2(54:4) | 10.49 | 12.42 | N/O   | N/O |
| Ac1PIM2(54:5) | N/O   | 7.62  | N/O   | N/O |
| Ac1PIM2(55:1) | N/O   | N/O   | 5.69  | N/O |
| Ac1PIM2(55:2) | N/O   | 8.43  | 19.13 | N/O |
| Ac1PIM2(55:3) | N/O   | 8.35  | N/O   | N/O |
| Ac1PIM2(55:4) | 16.28 | 12.58 | N/O   | N/O |
| Ac1PIM2(55:5) | N/O   | 8.07  | N/O   | N/O |
| Ac1PIM2(56:1) | 16.24 | N/O   | 16.50 | N/O |
| Ac1PIM2(56:2) | 14.65 | N/O   | N/O   | N/O |
| Ac1PIM2(56:3) | N/O   | 8.40  | N/O   | N/O |
| Ac1PIM2(57:1) | N/O   | 7.62  | 3.35  | N/O |
| Ac1PIM2(57:2) | N/O   | N/O   | 7.97  | N/O |
| Ac1PIM2(57:3) | N/O   | 8.45  | 2.83  | N/O |
| Ac1PIM2(57:4) | N/O   | 12.95 | N/O   | N/O |
| Ac1PIM2(C44)  | 10.53 | N/O   | N/O   | N/O |



|               |       |       |       |       |
|---------------|-------|-------|-------|-------|
| Ac1PIM2(C46)  | 11.64 | N/O   | N/O   | N/O   |
| Ac1PIM2(C48)  | 12.89 | N/O   | 8.85  | 22.27 |
| Ac1PIM2(C49)  | N/O   | 12.18 | N/O   | N/O   |
| Ac1PIM2(C50)  | 14.17 | N/O   | N/O   | N/O   |
| Ac1PIM2(C51)  | 16.23 | N/O   | 7.44  | N/O   |
| Ac1PIM2(C52)  | N/O   | 12.83 | N/O   | N/O   |
| Ac1PIM2(C53)  | N/O   | 5.69  | 8.42  | N/O   |
| Ac1PIM2(C55)  | N/O   | 9.43  | N/O   | N/O   |
| Ac1PIM2(C56)  | N/O   | N/O   | 16.88 | N/O   |
| Ac1PIM3(46:1) | N/O   | 7.87  | N/O   | 19.99 |
| Ac1PIM3(46:2) | N/O   | N/O   | 8.47  | N/O   |
| Ac1PIM3(47:1) | 16.98 | 7.94  | 22.00 | N/O   |
| Ac1PIM3(47:2) | N/O   | 8.18  | N/O   | N/O   |
| Ac1PIM3(48:2) | N/O   | 12.56 | N/O   | N/O   |
| Ac1PIM3(49:2) | N/O   | 8.37  | N/O   | N/O   |
| Ac1PIM3(49:3) | 6.86  | N/O   | N/O   | N/O   |
| Ac1PIM3(50:2) | N/O   | 12.95 | N/O   | N/O   |
| Ac1PIM3(50:3) | N/O   | 8.43  | 20.41 | N/O   |
| Ac1PIM3(50:5) | N/O   | N/O   | 16.38 | N/O   |
| Ac1PIM3(51:1) | N/O   | 10.99 | 19.18 | N/O   |
| Ac1PIM3(51:3) | 14.94 | 10.59 | N/O   | N/O   |
| Ac1PIM3(52:5) | N/O   | 8.43  | N/O   | N/O   |
| Ac1PIM3(53:3) | N/O   | N/O   | 20.21 | N/O   |
| Ac1PIM3(54:1) | N/O   | 3.52  | N/O   | N/O   |
| Ac1PIM3(54:3) | 8.97  | N/O   | N/O   | N/O   |
| Ac1PIM3(54:5) | N/O   | N/O   | 20.94 | N/O   |
| Ac1PIM3(55:1) | N/O   | N/O   | 20.81 | N/O   |
| Ac1PIM3(55:5) | 16.89 | N/O   | N/O   | N/O   |
| Ac1PIM3(56:1) | N/O   | 10.59 | N/O   | N/O   |
| Ac1PIM3(57:1) | N/O   | 10.69 | N/O   | N/O   |

|               |       |       |       |     |
|---------------|-------|-------|-------|-----|
| Ac1PIM3(C44)  | N/O   | N/O   | 9.58  | N/O |
| Ac1PIM3(C46)  | 16.24 | N/O   | 18.75 | N/O |
| Ac1PIM3(C48)  | N/O   | N/O   | 18.98 | N/O |
| Ac1PIM3(C49)  | N/O   | N/O   | 19.20 | N/O |
| Ac1PIM3(C50)  | N/O   | N/O   | 19.23 | N/O |
| Ac1PIM3(C51)  | N/O   | N/O   | 19.31 | N/O |
| Ac1PIM3(C55)  | 15.14 | N/O   | N/O   | N/O |
| Ac1PIM4(46:2) | N/O   | 7.79  | 20.20 | N/O |
| Ac1PIM4(48:3) | N/O   | 7.62  | N/O   | N/O |
| Ac1PIM4(48:4) | N/O   | 7.54  | N/O   | N/O |
| Ac1PIM4(50:2) | 6.42  | N/O   | N/O   | N/O |
| Ac1PIM4(50:3) | N/O   | 8.12  | N/O   | N/O |
| Ac1PIM4(50:5) | N/O   | N/O   | 9.18  | N/O |
| Ac1PIM4(51:2) | N/O   | N/O   | 9.45  | N/O |
| Ac1PIM4(51:3) | N/O   | 8.71  | N/O   | N/O |
| Ac1PIM4(51:4) | 6.88  | N/O   | N/O   | N/O |
| Ac1PIM4(52:2) | N/O   | N/O   | 19.63 | N/O |
| Ac1PIM4(53:1) | 6.47  | N/O   | N/O   | N/O |
| Ac1PIM4(53:3) | N/O   | 8.90  | N/O   | N/O |
| Ac1PIM4(53:4) | N/O   | 8.75  | N/O   | N/O |
| Ac1PIM4(54:1) | N/O   | 8.40  | N/O   | N/O |
| Ac1PIM4(54:5) | 15.40 | N/O   | N/O   | N/O |
| Ac1PIM4(55:4) | N/O   | 8.92  | N/O   | N/O |
| Ac1PIM4(55:5) | N/O   | 8.78  | N/O   | N/O |
| Ac1PIM4(56:3) | N/O   | 7.92  | N/O   | N/O |
| Ac1PIM4(57:4) | 16.11 | 8.42  | N/O   | N/O |
| Ac1PIM4(C44)  | N/O   | N/O   | 19.92 | N/O |
| Ac1PIM4(C46)  | N/O   | N/O   | 19.48 | N/O |
| Ac1PIM4(C50)  | N/O   | 11.62 | N/O   | N/O |
| Ac1PIM4(C51)  | N/O   | 11.88 | 18.07 | N/O |

|               |       |       |       |       |
|---------------|-------|-------|-------|-------|
| Ac1PIM4(C52)  | N/O   | 11.90 | N/O   | N/O   |
| Ac1PIM4(C55)  | 7.04  | N/O   | N/O   | N/O   |
| Ac1PIM5(50:4) | N/O   | 8.22  | N/O   | N/O   |
| Ac1PIM5(51:5) | 16.81 | N/O   | N/O   | N/O   |
| Ac1PIM5(52:3) | N/O   | 8.58  | N/O   | N/O   |
| Ac1PIM5(52:4) | N/O   | 8.37  | 21.01 | N/O   |
| Ac1PIM5(53:1) | N/O   | N/O   | 21.79 | N/O   |
| Ac1PIM5(53:5) | 17.77 | N/O   | N/O   | N/O   |
| Ac1PIM5(54:3) | N/O   | 8.05  | N/O   | N/O   |
| Ac1PIM5(54:4) | N/O   | 8.58  | N/O   | N/O   |
| Ac1PIM5(56:4) | N/O   | 8.75  | N/O   | N/O   |
| Ac1PIM5(C44)  | 16.89 | N/O   | N/O   | N/O   |
| Ac1PIM5(C49)  | N/O   | 8.71  | N/O   | N/O   |
| Ac1PIM5(C51)  | N/O   | 8.86  | N/O   | N/O   |
| Ac1PIM6(C44)  | N/O   | 8.40  | N/O   | N/O   |
| Ac1PIM6(C46)  | N/O   | 8.53  | N/O   | N/O   |
| Ac2PIM2(60:1) | 16.58 | N/O   | N/O   | N/O   |
| Ac2PIM2(61:1) | N/O   | 10.34 | 7.31  | N/O   |
| Ac2PIM2(62:1) | N/O   | 12.22 | N/O   | N/O   |
| Ac2PIM2(62:2) | N/O   | N/O   | N/O   | 21.62 |
| Ac2PIM2(62:3) | 14.10 | N/O   | N/O   | N/O   |
| Ac2PIM2(63:2) | 14.73 | 5.43  | 19.81 | N/O   |
| Ac2PIM2(64:1) | N/O   | N/O   | 5.40  | N/O   |
| Ac2PIM2(64:2) | N/O   | N/O   | 7.37  | N/O   |
| Ac2PIM2(64:4) | 14.66 | 10.67 | N/O   | N/O   |
| Ac2PIM2(64:5) | N/O   | 11.19 | N/O   | N/O   |
| Ac2PIM2(65:2) | N/O   | 10.57 | N/O   | N/O   |
| Ac2PIM2(65:3) | N/O   | N/O   | 2.79  | N/O   |
| Ac2PIM2(66:3) | 17.50 | 10.92 | 20.40 | N/O   |
| Ac2PIM2(66:4) | 15.43 | N/O   | N/O   | N/O   |

|               |       |       |       |       |
|---------------|-------|-------|-------|-------|
| Ac2PIM2(66:5) | N/O   | N/O   | N/O   | 16.23 |
| Ac2PIM2(67:1) | N/O   | N/O   | 8.42  | N/O   |
| Ac2PIM2(67:2) | N/O   | 12.98 | N/O   | N/O   |
| Ac2PIM2(67:3) | N/O   | 11.00 | 20.49 | N/O   |
| Ac2PIM2(68:1) | N/O   | 11.74 | N/O   | N/O   |
| Ac2PIM2(68:4) | 16.14 | N/O   | N/O   | N/O   |
| Ac2PIM2(68:5) | N/O   | N/O   | N/O   | 16.98 |
| Ac2PIM2(69:1) | N/O   | 11.75 | 9.94  | N/O   |
| Ac2PIM2(69:4) | N/O   | 6.43  | 7.07  | N/O   |
| Ac2PIM2(69:6) | N/O   | N/O   | 9.53  | N/O   |
| Ac2PIM2(70:1) | N/O   | 12.02 | N/O   | N/O   |
| Ac2PIM2(70:2) | N/O   | N/O   | 8.77  | N/O   |
| Ac2PIM2(70:4) | 16.84 | N/O   | N/O   | N/O   |
| Ac2PIM2(70:5) | 16.45 | N/O   | 6.41  | N/O   |
| Ac2PIM2(70:6) | 11.02 | 4.62  | N/O   | N/O   |
| Ac2PIM2(71:1) | N/O   | 12.03 | 8.63  | N/O   |
| Ac2PIM2(71:2) | N/O   | N/O   | 8.14  | N/O   |
| Ac2PIM2(71:3) | N/O   | N/O   | 2.86  | N/O   |
| Ac2PIM2(71:4) | N/O   | 7.46  | 7.37  | 16.93 |
| Ac2PIM2(72:1) | N/O   | 12.03 | 8.12  | N/O   |
| Ac2PIM2(72:6) | N/O   | N/O   | 6.34  | N/O   |
| Ac2PIM2(73:1) | N/O   | 7.89  | N/O   | N/O   |
| Ac2PIM2(73:2) | N/O   | 7.75  | N/O   | N/O   |
| Ac2PIM2(73:4) | N/O   | 12.12 | 8.09  | 17.95 |
| Ac2PIM2(74:1) | N/O   | N/O   | 8.18  | N/O   |
| Ac2PIM2(74:3) | N/O   | N/O   | 8.07  | N/O   |
| Ac2PIM2(74:4) | N/O   | 12.23 | N/O   | N/O   |
| Ac2PIM2(75:4) | N/O   | N/O   | 8.85  | N/O   |
| Ac2PIM2(C60)  | 16.92 | N/O   | N/O   | N/O   |
| Ac2PIM2(C61)  | N/O   | N/O   | 7.70  | 17.04 |

|               |       |       |       |       |
|---------------|-------|-------|-------|-------|
| Ac2PIM2(C63)  | 13.87 | 4.49  | N/O   | N/O   |
| Ac2PIM2(C65)  | N/O   | 8.05  | 20.66 | N/O   |
| Ac2PIM2(C66)  | N/O   | N/O   | 20.88 | N/O   |
| Ac2PIM2(C67)  | N/O   | N/O   | 9.12  | N/O   |
| Ac2PIM2(C68)  | N/O   | N/O   | 21.06 | N/O   |
| Ac2PIM2(C69)  | N/O   | N/O   | 7.29  | N/O   |
| Ac2PIM2(C70)  | N/O   | N/O   | 9.03  | N/O   |
| Ac2PIM2(C71)  | N/O   | N/O   | 8.09  | N/O   |
| Ac2PIM3(63:1) | 11.02 | N/O   | N/O   | N/O   |
| Ac2PIM3(64:1) | 16.12 | N/O   | N/O   | N/O   |
| Ac2PIM3(65:2) | N/O   | 5.71  | N/O   | N/O   |
| Ac2PIM3(65:4) | 16.91 | N/O   | N/O   | N/O   |
| Ac2PIM3(65:5) | 16.79 | N/O   | N/O   | N/O   |
| Ac2PIM3(66:1) | 16.84 | N/O   | N/O   | N/O   |
| Ac2PIM3(67:2) | N/O   | N/O   | 3.77  | N/O   |
| Ac2PIM3(67:5) | 17.23 | N/O   | N/O   | N/O   |
| Ac2PIM3(67:6) | 17.11 | N/O   | N/O   | N/O   |
| Ac2PIM3(68:2) | 17.11 | N/O   | N/O   | N/O   |
| Ac2PIM3(68:3) | 16.86 | N/O   | N/O   | 17.89 |
| Ac2PIM3(68:4) | 16.77 | N/O   | N/O   | N/O   |
| Ac2PIM3(68:6) | N/O   | N/O   | 19.46 | N/O   |
| Ac2PIM3(69:2) | N/O   | 4.07  | 4.60  | N/O   |
| Ac2PIM3(69:6) | 18.11 | N/O   | N/O   | N/O   |
| Ac2PIM3(70:3) | N/O   | N/O   | 5.43  | N/O   |
| Ac2PIM3(71:1) | 19.81 | N/O   | N/O   | N/O   |
| Ac2PIM3(71:2) | N/O   | 11.42 | 6.36  | N/O   |
| Ac2PIM3(71:3) | 16.96 | N/O   | N/O   | N/O   |
| Ac2PIM3(71:6) | 19.30 | N/O   | N/O   | N/O   |
| Ac2PIM3(72:5) | N/O   | 5.55  | N/O   | N/O   |
| Ac2PIM3(73:2) | N/O   | 11.62 | N/O   | N/O   |

|                      |       |       |       |       |
|----------------------|-------|-------|-------|-------|
| Ac2PIM3(73:3)        | N/O   | 5.48  | 5.35  | N/O   |
| Ac2PIM3(73:4)        | N/O   | 10.43 | N/O   | N/O   |
| Ac2PIM3(74:3)        | N/O   | 10.43 | N/O   | N/O   |
| Ac2PIM3(74:4)        | N/O   | N/O   | 5.36  | N/O   |
| Ac2PIM3(74:5)        | N/O   | 6.76  | N/O   | N/O   |
| Ac2PIM3(75:1)        | N/O   | N/O   | 6.39  | 22.24 |
| Ac2PIM3(75:3)        | N/O   | N/O   | 6.72  | N/O   |
| Ac2PIM3(75:5)        | N/O   | N/O   | 23.88 | N/O   |
| Ac2PIM3(C60)         | N/O   | N/O   | 7.07  | N/O   |
| Ac2PIM3(C69)         | N/O   | N/O   | 4.58  | N/O   |
| Ac2PIM3(C72)         | 19.83 | N/O   | 8.40  | N/O   |
| Ac2PIM3(C73)         | N/O   | N/O   | 7.74  | N/O   |
| Ac2PIM3(C74)         | 16.99 | N/O   | 23.79 | N/O   |
| Ac2PIM4(67:3)        | N/O   | N/O   | 23.73 | N/O   |
| Ac2PIM4(67:4)        | 19.11 | N/O   | N/O   | N/O   |
| Ac2PIM4(68:3)        | N/O   | N/O   | 23.90 | N/O   |
| Ac2SGL(C53)          | N/O   | 9.01  | N/O   | N/O   |
| Ac2SGL(C56)          | 11.02 | N/O   | N/O   | N/O   |
| Ac2SGL(C58)          | N/O   | N/O   | N/O   | 17.91 |
| Ac2SGL(C60)          | 17.72 | 5.65  | 19.78 | 19.25 |
| Ac2SGL(C62)          | 19.08 | 7.11  | N/O   | 21.27 |
| Ac2SGL(C65)          | N/O   | 10.63 | N/O   | N/O   |
| Ac2SGL(C68)          | N/O   | N/O   | 19.86 | N/O   |
| Ac2SGL(C70)          | N/O   | N/O   | 20.08 | N/O   |
| Ac2SGL(C71)          | N/O   | 12.56 | 19.40 | N/O   |
| Ac2SGL(C72)          | N/O   | 7.42  | N/O   | N/O   |
| Ac2SGL(C73)          | N/O   | 7.59  | N/O   | 20.03 |
| Ac2SGL(C74)          | N/O   | 7.87  | N/O   | N/O   |
| Ac2SGL(C75)          | N/O   | 7.94  | N/O   | N/O   |
| Alpha-MA(C79H158NO3) | N/O   | 12.98 | N/O   | N/O   |

|                       |       |       |       |       |
|-----------------------|-------|-------|-------|-------|
| Alpha-MA(C85H167O3)   | N/O   | 7.87  | N/O   | N/O   |
| Alpha-MA(C87H171O3)   | N/O   | 7.19  | 5.96  | N/O   |
| Alpha-MA(C86H172NO3)  | N/O   | 7.77  | N/O   | 21.67 |
| Alpha-MA(C93H183O3)   | N/O   | 8.35  | N/O   | N/O   |
| Alpha-MA(C94H188NO3)  | N/O   | 8.02  | N/O   | N/O   |
| Alpha-MA(C85H170NO3)  | 19.32 | N/O   | N/O   | N/O   |
| Alpha-MA(C83H161O3)   | N/O   | N/O   | N/O   | 15.17 |
| Alpha-MA(C84H165O3)   | N/O   | N/O   | N/O   | 22.32 |
| Alpha-MA(C94H183O3)   | N/O   | N/O   | N/O   | 6.86  |
| Alpha-MA(C75H145O3)   | N/O   | N/O   | 20.88 | N/O   |
| Alpha-MA(C74H144O3Na) | N/O   | N/O   | 10.36 | N/O   |
| Alpha-MA(C76H147O3)   | N/O   | N/O   | 21.11 | N/O   |
| Alpha-MA(C77H149O3)   | N/O   | N/O   | 21.23 | N/O   |
| Alpha-MA(C79H153O3)   | N/O   | N/O   | 21.57 | N/O   |
| Alpha-MA(C88H172O3Na) | N/O   | N/O   | 7.07  | N/O   |
| CL(58:2)              | N/O   | N/O   | 8.88  | N/O   |
| CL(59:2)              | 17.49 | N/O   | N/O   | N/O   |
| CL(59:3)              | N/O   | N/O   | 8.14  | 16.46 |
| CL(60:2)              | 18.09 | N/O   | N/O   | N/O   |
| CL(61:1)              | N/O   | 10.21 | N/O   | N/O   |
| CL(61:3)              | 16.28 | N/O   | N/O   | 21.58 |
| CL(62:2)              | 19.84 | N/O   | N/O   | N/O   |
| CL(62:3)              | 19.84 | N/O   | N/O   | N/O   |
| CL(62:4)              | 18.08 | N/O   | N/O   | N/O   |
| CL(63:2)              | N/O   | 12.55 | N/O   | N/O   |
| CL(63:3)              | N/O   | N/O   | 9.56  | N/O   |
| CL(63:4)              | 16.79 | N/O   | N/O   | N/O   |
| CL(64:1)              | N/O   | N/O   | 7.42  | N/O   |
| CL(64:2)              | N/O   | 9.25  | 8.38  | 22.00 |
| CL(64:3)              | N/O   | 12.45 | 7.55  | N/O   |

|          |       |       |       |       |
|----------|-------|-------|-------|-------|
| CL(65:2) | N/O   | 12.98 | 9.10  | N/O   |
| CL(65:3) | 18.06 | 12.55 | 8.27  | N/O   |
| CL(66:1) | 15.05 | N/O   | 7.27  | N/O   |
| CL(66:2) | N/O   | N/O   | 9.49  | N/O   |
| CL(66:4) | N/O   | 8.12  | N/O   | N/O   |
| CL(67:3) | N/O   | 7.52  | 9.21  | 22.24 |
| CL(68:3) | 13.99 | N/O   | 9.41  | N/O   |
| CL(69:2) | 15.17 | 14.18 | N/O   | N/O   |
| CL(69:3) | N/O   | 9.41  | N/O   | N/O   |
| CL(69:4) | N/O   | 7.55  | N/O   | N/O   |
| CL(70:1) | N/O   | 8.05  | N/O   | N/O   |
| CL(70:3) | N/O   | 10.63 | 7.47  | N/O   |
| CL(71:1) | N/O   | 11.39 | 8.42  | N/O   |
| CL(71:4) | N/O   | 7.52  | N/O   | N/O   |
| CL(72:1) | N/O   | 11.52 | N/O   | N/O   |
| CL(72:3) | 10.99 | N/O   | N/O   | N/O   |
| CL(72:4) | N/O   | 9.26  | N/O   | N/O   |
| CL(73:1) | 11.05 | N/O   | 21.56 | N/O   |
| CL(73:3) | N/O   | 10.77 | N/O   | N/O   |
| CL(73:4) | N/O   | 8.12  | N/O   | N/O   |
| CL(75:3) | 11.00 | 11.35 | 8.42  | N/O   |
| CL(76:3) | N/O   | N/O   | 16.73 | N/O   |
| CL(78:3) | 11.02 | N/O   | 10.11 | N/O   |
| CL(80:2) | N/O   | 8.02  | N/O   | N/O   |
| CL(82:1) | N/O   | 11.29 | N/O   | N/O   |
| CL(90:2) | N/O   | 9.25  | N/O   | N/O   |
| CL(C60)  | N/O   | 10.44 | N/O   | N/O   |
| CL(C61)  | N/O   | 10.29 | N/O   | N/O   |
| CL(C64)  | N/O   | 7.37  | N/O   | N/O   |
| CL(C67)  | 15.12 | N/O   | N/O   | N/O   |



|            |       |       |       |       |
|------------|-------|-------|-------|-------|
| CL(C68)    | N/O   | N/O   | 21.29 | N/O   |
| CL(C69)    | N/O   | N/O   | 8.40  | N/O   |
| CL(C74)    | N/O   | 8.35  | 16.73 | N/O   |
| CL(C76)    | N/O   | N/O   | 12.88 | N/O   |
| CL(C82)    | N/O   | 11.37 | N/O   | N/O   |
| CL(C84)    | N/O   | N/O   | 8.40  | N/O   |
| CL(C88)    | N/O   | 9.26  | N/O   | N/O   |
| DAT1(C52)  | N/O   | 7.92  | N/O   | N/O   |
| DAT1(C54)  | 14.63 | N/O   | N/O   | N/O   |
| DAT1(C56)  | N/O   | N/O   | 18.63 | N/O   |
| DAT2(C57)  | N/O   | 9.45  | N/O   | N/O   |
| DG(31:2)   | N/O   | N/O   | N/O   | 19.42 |
| DG(32:2)   | 14.94 | N/O   | N/O   | N/O   |
| DG(33:1)   | 16.42 | 4.92  | 5.68  | 17.34 |
| DG(35:1)   | 20.00 | N/O   | N/O   | N/O   |
| DG(36:2)   | 19.95 | N/O   | N/O   | 19.33 |
| DG(37:1)   | 15.03 | N/O   | N/O   | N/O   |
| DG(37:2)   | 17.72 | N/O   | N/O   | 19.28 |
| DG(38:2)   | 14.96 | N/O   | 8.00  | N/O   |
| DG(39:1)   | 15.36 | N/O   | N/O   | N/O   |
| DG(C34)    | 20.00 | N/O   | N/O   | N/O   |
| DG(C35)    | 16.06 | N/O   | N/O   | N/O   |
| DG(C40)    | 17.69 | N/O   | 8.80  | 19.78 |
| DG(C46)    | N/O   | 4.92  | N/O   | N/O   |
| DG(C47)    | N/O   | 6.69  | N/O   | N/O   |
| DG(C48)    | N/O   | 7.31  | N/O   | N/O   |
| DIMA(C105) | N/O   | N/O   | 15.87 | N/O   |
| DIMA(C81)  | N/O   | N/O   | 8.23  | N/O   |
| DIMA(C82)  | N/O   | N/O   | 8.90  | N/O   |
| DIMA(C85)  | N/O   | N/O   | N/O   | 20.69 |

|                    |       |      |       |       |
|--------------------|-------|------|-------|-------|
| DIMA(C86)          | 19.47 | N/O  | N/O   | 19.32 |
| DIMA(C88)          | 17.47 | N/O  | N/O   | N/O   |
| DIMA(C90)          | 17.65 | N/O  | N/O   | N/O   |
| DIMA(C91)          | N/O   | N/O  | 4.90  | N/O   |
| DIMA(C92)          | N/O   | N/O  | 5.60  | N/O   |
| DIMA(C93)          | N/O   | 7.42 | 6.24  | N/O   |
| DIMA(C94)          | N/O   | N/O  | 6.91  | N/O   |
| DIMA(C95)          | N/O   | 7.79 | N/O   | N/O   |
| DIMA(C96)          | N/O   | N/O  | 8.17  | N/O   |
| DIMB(C100)         | N/O   | 8.29 | N/O   | N/O   |
| DIMB(C101)         | N/O   | 7.52 | 6.64  | N/O   |
| DIMB(C102)         | N/O   | 8.40 | 8.80  | 20.20 |
| DIMB(C103)         | N/O   | 8.70 | 7.57  | N/O   |
| DIMB(C104)         | 19.86 | 8.83 | 8.20  | 22.24 |
| DIMB(C105)         | N/O   | 8.95 | 15.17 | N/O   |
| DIMB(C83)          | N/O   | N/O  | 8.35  | 20.68 |
| DIMB(C85)          | N/O   | N/O  | 9.21  | N/O   |
| DIMB(C87)          | 18.11 | N/O  | N/O   | N/O   |
| DIMB(C88)          | 17.26 | N/O  | N/O   | N/O   |
| DIMB(C89)          | 19.30 | N/O  | N/O   | N/O   |
| DIMB(C90)          | 18.93 | N/O  | N/O   | N/O   |
| DIMB(C91)          | 18.93 | N/O  | N/O   | N/O   |
| DIMB(C92)          | 18.93 | N/O  | N/O   | N/O   |
| DIMB(C96)          | N/O   | N/O  | 15.67 | N/O   |
| DIMB(C98)          | N/O   | 7.95 | N/O   | N/O   |
| DIMB(C99)          | N/O   | 8.05 | 8.70  | N/O   |
| DP-P(C)            | 14.91 | N/O  | N/O   | N/O   |
| DP-PP(C)           | N/O   | 2.45 | 3.14  | 16.15 |
| GMM(Alpha-MA)(C79) | N/O   | N/O  | 15.75 | N/O   |
| GMM(Alpha-MA)(C81) | N/O   | N/O  | 16.56 | 6.13  |

|                                |       |      |       |       |
|--------------------------------|-------|------|-------|-------|
| GMM(Alpha-MA)(C86)             | N/O   | N/O  | 17.76 | N/O   |
| GMM(Alpha-MA)(C87)             | N/O   | N/O  | 18.17 | N/O   |
| GMM(Alpha-MA)(C89)             | N/O   | N/O  | 18.49 | N/O   |
| GMM(keto-MA)(C91)              | N/O   | N/O  | 15.65 | N/O   |
| GMM(methoxy-MA)(C86)           | N/O   | N/O  | N/O   | 6.48  |
| GMM(methoxy-MA)(C92)           | N/O   | N/O  | 6.87  | N/O   |
| GPD(C106)                      | N/O   | N/O  | 11.72 | N/O   |
| GPD(C111)                      | N/O   | N/O  | 16.91 | N/O   |
| Hydroxyphthioceranic acid(C33) | N/O   | N/O  | N/O   | 19.75 |
| Hydroxyphthioceranic acid(C36) | N/O   | N/O  | 7.74  | N/O   |
| Keto-MA(C75)                   | N/O   | 9.41 | N/O   | N/O   |
| Keto-MA(C77)                   | N/O   | N/O  | 20.03 | N/O   |
| Keto-MA(C82)                   | N/O   | N/O  | N/O   | 15.15 |
| Keto-MA(C83)                   | N/O   | N/O  | N/O   | 20.94 |
| Keto-MA(C84)                   | 18.57 | 7.72 | N/O   | N/O   |
| Keto-MA(C85)                   | 19.01 | N/O  | 9.80  | N/O   |
| Keto-MA(C86)                   | 19.35 | N/O  | N/O   | 21.04 |
| Keto-MA(C87)                   | 19.35 | N/O  | N/O   | 12.30 |
| Keto-MA(C88)                   | 18.58 | 7.89 | N/O   | N/O   |
| Keto-MA(C90)                   | N/O   | 8.23 | N/O   | N/O   |
| Keto-MA(C93)                   | N/O   | N/O  | N/O   | 6.54  |
| LPE(16:1)                      | 9.80  | 1.30 | N/O   | 6.69  |
| LPE(17:1)                      | 14.63 | N/O  | N/O   | N/O   |
| LPE(18:1)                      | N/O   | N/O  | 2.31  | 12.99 |
| LPE(19:1)                      | 11.53 | 1.96 | 2.65  | 12.66 |
| LPE(C16)                       | 14.40 | 1.55 | 1.98  | 11.46 |
| LPE(C18)                       | 11.87 | 2.19 | 2.10  | 6.63  |
| LPE(C19)                       | 11.31 | 2.38 | 9.68  | 13.19 |

|             |       |       |       |       |
|-------------|-------|-------|-------|-------|
| LPE(C20)    | 11.94 | 2.10  | 2.81  | 13.97 |
| LPG(16:1)   | 13.87 | N/O   | N/O   | 4.86  |
| LPG(18:1)   | N/O   | N/O   | N/O   | 7.31  |
| LPG(19:1)   | 13.59 | N/O   | N/O   | 7.40  |
| LPG(C16)    | 6.57  | N/O   | N/O   | 7.27  |
| LPG(C17)    | 17.91 | N/O   | N/O   | N/O   |
| LPG(C18)    | 19.93 | N/O   | N/O   | 7.27  |
| LPG(C19)    | N/O   | N/O   | 1.98  | N/O   |
| LPG(C20)    | N/O   | N/O   | N/O   | 15.24 |
| LPI(18:1)   | 11.48 | 1.27  | 1.63  | 10.49 |
| LPI(18:2)   | N/O   | 1.05  | N/O   | 20.89 |
| LPI(19:1)   | N/O   | N/O   | N/O   | 5.84  |
| LPI(19:2)   | N/O   | 8.33  | 7.39  | 21.95 |
| LPI(C18)    | N/O   | N/O   | N/O   | 4.70  |
| LPI(C19)    | 13.36 | N/O   | N/O   | N/O   |
| LPIM1(18:2) | N/O   | 3.49  | N/O   | N/O   |
| LPIM1(19:2) | N/O   | 4.55  | 4.93  | N/O   |
| LPIM1(C19)  | 5.77  | N/O   | N/O   | N/O   |
| LPIM2(18:2) | N/O   | N/O   | 9.68  | N/O   |
| LPIM2(19:1) | N/O   | 10.41 | 8.35  | N/O   |
| LPIM2(19:2) | N/O   | 10.32 | N/O   | N/O   |
| LPIM2(C16)  | 14.94 | N/O   | N/O   | 6.54  |
| LPIM2(C17)  | 15.01 | 10.16 | 16.91 | N/O   |
| LPIM2(C18)  | 15.77 | N/O   | N/O   | N/O   |
| LPIM2(C19)  | 5.33  | 10.28 | 17.43 | N/O   |
| LPIM3(18:1) | N/O   | N/O   | N/O   | 9.40  |
| LPIM3(18:2) | N/O   | N/O   | 14.08 | N/O   |
| LPIM3(19:1) | 19.21 | 12.15 | N/O   | N/O   |
| LPIM3(C16)  | 15.72 | N/O   | 9.86  | 6.13  |
| LPIM3(C17)  | N/O   | N/O   | N/O   | 12.00 |

|                 |       |      |       |       |
|-----------------|-------|------|-------|-------|
| LPIM3(C18)      | N/O   | N/O  | N/O   | 21.32 |
| LPIM3(C19)      | N/O   | N/O  | N/O   | 21.34 |
| LPIM4(19:1)     | N/O   | N/O  | N/O   | 9.51  |
| LPIM5(19:2)     | N/O   | N/O  | 2.86  | N/O   |
| LPIM5(C18)      | N/O   | N/O  | N/O   | 22.30 |
| LPIM5(C19)      | N/O   | N/O  | 6.86  | 18.28 |
| LPIM6(18:1)     | 19.84 | 9.13 | N/O   | N/O   |
| LPIM6(18:2)     | N/O   | N/O  | N/O   | 20.63 |
| LPIM6(19:1)     | N/O   | 9.18 | N/O   | N/O   |
| LPIM6(C16)      | N/O   | 8.47 | N/O   | N/O   |
| LPIM6(C17)      | N/O   | 8.60 | N/O   | N/O   |
| LPIM6(C19)      | N/O   | 8.90 | 6.36  | N/O   |
| Mbt -Fe(17:1)   | 15.50 | 7.04 | 7.29  | N/O   |
| Mbt -Fe(18:1)   | N/O   | N/O  | 10.22 | N/O   |
| Mbt -Fe(20:1)   | N/O   | 7.85 | N/O   | N/O   |
| Mbt -Fe(C17)    | N/O   | 7.72 | 10.76 | 15.18 |
| Mbt -Fe(C18)    | N/O   | 8.78 | 8.22  | N/O   |
| Mbt -Fe(C19)    | 14.82 | 8.14 | N/O   | 22.45 |
| Mbt +Fe(17:1)   | 15.77 | 2.99 | 7.52  | 16.56 |
| Mbt +Fe(18:1)   | N/O   | 7.44 | N/O   | N/O   |
| Mbt +Fe(19:1)   | 16.42 | 4.05 | N/O   | N/O   |
| Mbt +Fe(20:1)   | 6.23  | N/O  | N/O   | N/O   |
| Mbt +Fe(C17)    | N/O   | 4.16 | 8.63  | N/O   |
| Mbt +Fe(C18)    | N/O   | 5.38 | 5.58  | N/O   |
| Mbt +Fe(C19)    | N/O   | N/O  | 8.30  | N/O   |
| Mbt +Fe(C20)    | N/O   | N/O  | 3.89  | N/O   |
| Methoxy-MA(C74) | N/O   | N/O  | 8.09  | N/O   |
| Methoxy-MA(C83) | N/O   | N/O  | 9.82  | 20.16 |
| Methoxy-MA(C84) | N/O   | N/O  | N/O   | 21.06 |
| Methoxy-MA(C85) | 19.84 | N/O  | N/O   | 19.28 |

|                                           |       |      |      |       |
|-------------------------------------------|-------|------|------|-------|
| Methoxy-MA(C86)                           | 17.81 | 7.87 | N/O  | 19.88 |
| Methoxy-MA(C87)                           | 19.03 | 7.95 | N/O  | 21.06 |
| Methoxy-MA(C88)                           | 19.84 | N/O  | N/O  | N/O   |
| Methoxy-MA(C89)                           | 18.89 | N/O  | N/O  | N/O   |
| Methoxy-MA(C90)                           | 19.84 | N/O  | N/O  | 22.32 |
| Methoxy-MA(C91)                           | N/O   | 7.69 | 6.34 | N/O   |
| Methoxy-MA(C92)                           | N/O   | 7.85 | N/O  | N/O   |
| Methoxy-MA(C93)                           | N/O   | 7.83 | 7.62 | N/O   |
| Methoxy-MA(C94)                           | N/O   | 8.18 | 8.37 | N/O   |
| MG(15:1)                                  | 11.48 | N/O  | N/O  | N/O   |
| MG(17:1)                                  | 15.35 | N/O  | N/O  | 9.33  |
| MG(18:1)                                  | 14.82 | N/O  | N/O  | N/O   |
| MG(20:1)                                  | 5.11  | N/O  | N/O  | 19.81 |
| MG(22:1)                                  | N/O   | N/O  | N/O  | 12.55 |
| MG(C15)                                   | N/O   | N/O  | N/O  | 15.44 |
| MG(C16)                                   | 14.22 | N/O  | N/O  | N/O   |
| MG(C17)                                   | N/O   | N/O  | N/O  | 15.04 |
| MG(C18)                                   | 14.82 | N/O  | N/O  | N/O   |
| MG(C19)                                   | 12.53 | N/O  | N/O  | N/O   |
| MG(C20)                                   | 15.77 | N/O  | N/O  | N/O   |
| MG(C22)                                   | 16.48 | N/O  | N/O  | N/O   |
| MG(C24)                                   | N/O   | N/O  | N/O  | 11.53 |
| MPM(C31)                                  | N/O   | 2.16 | 9.49 | N/O   |
| MPM(C32)                                  | N/O   | N/O  | 7.81 | N/O   |
| Mycocerosic or<br>Phthioceranic acid(C33) | 17.70 | N/O  | N/O  | 19.75 |
| Mycolipanic acid(C24)                     | N/O   | N/O  | 6.89 | 12.12 |
| Mycolipanic acid(C24)                     | N/O   | N/O  | N/O  | N/O   |
| Mycolipanic acid(C26)                     | 17.67 | N/O  | N/O  | N/O   |
| Mycolipenic acid(C25)                     | 19.95 | N/O  | N/O  | N/O   |

|                                     |       |      |       |       |
|-------------------------------------|-------|------|-------|-------|
| Mycolipenic acid(C27)               | N/O   | N/O  | N/O   | 17.21 |
| Mycolipenic acid(C28)               | N/O   | N/O  | 19.31 | 16.66 |
| Mycosanoic or Mycocerosic acid(C24) | 18.26 | N/O  | N/O   | 15.63 |
| PE(30:1)                            | 14.91 | N/O  | N/O   | N/O   |
| PE(31:1)                            | 18.74 | N/O  | N/O   | N/O   |
| PE(32:2)                            | N/O   | N/O  | 1.03  | N/O   |
| PE(33:1)                            | 10.15 | N/O  | 7.75  | N/O   |
| PE(33:2)                            | 14.92 | N/O  | N/O   | N/O   |
| PE(34:1)                            | N/O   | 7.94 | N/O   | N/O   |
| PE(34:2)                            | N/O   | 7.54 | 5.95  | N/O   |
| PE(35:2)                            | N/O   | N/O  | 7.92  | 12.23 |
| PE(36:2)                            | 15.17 | N/O  | N/O   | 16.29 |
| PE(37:2)                            | 16.14 | N/O  | N/O   | N/O   |
| PE(C30)                             | N/O   | 7.27 | N/O   | 19.20 |
| PE(C31)                             | 12.29 | N/O  | 3.52  | N/O   |
| PE(C32)                             | N/O   | N/O  | N/O   | 20.21 |
| PE(C37)                             | N/O   | N/O  | 8.50  | N/O   |
| PE(C38)                             | N/O   | N/O  | 10.76 | N/O   |
| PG(32:1)                            | N/O   | 5.58 | 5.05  | N/O   |
| PG(32:2)                            | N/O   | 1.05 | 1.23  | 11.39 |
| PG(33:1)                            | 16.50 | 6.38 | N/O   | N/O   |
| PG(33:2)                            | 16.89 | 1.25 | N/O   | N/O   |
| PG(34:1)                            | N/O   | 7.19 | 7.04  | N/O   |
| PG(34:2)                            | N/O   | N/O  | 6.23  | 14.04 |
| PG(35:2)                            | 19.21 | 7.35 | 2.86  | N/O   |
| PG(36:2)                            | N/O   | N/O  | N/O   | 15.18 |
| PG(42:1)                            | 10.97 | N/O  | N/O   | N/O   |
| PG(44:1)                            | N/O   | N/O  | 18.57 | N/O   |
| PG(45:1)                            | 14.63 | N/O  | N/O   | N/O   |

|                         |       |      |       |       |
|-------------------------|-------|------|-------|-------|
| PG(C30)                 | N/O   | 2.19 | 2.93  | 17.14 |
| PG(C31)                 | 10.99 | N/O  | N/O   | N/O   |
| PG(C32)                 | N/O   | N/O  | N/O   | 22.32 |
| PG(C33)                 | N/O   | N/O  | 10.67 | N/O   |
| PG(C34)                 | N/O   | N/O  | 7.44  | N/O   |
| PG(C36)                 | N/O   | N/O  | 7.50  | N/O   |
| PG(C44)                 | 15.21 | N/O  | N/O   | N/O   |
| PGL-tb(C105)            | N/O   | N/O  | 21.64 | N/O   |
| Phthioceranic acid(C42) | N/O   | 1.05 | N/O   | N/O   |
| Phthioceranic acid(C45) | 6.79  | N/O  | N/O   | N/O   |
| PI(32:1)                | N/O   | 7.46 | 9.51  | N/O   |
| PI(32:2)                | N/O   | N/O  | 6.89  | N/O   |
| PI(33:1)                | N/O   | 5.41 | 2.69  | N/O   |
| PI(33:2)                | N/O   | 7.62 | 7.35  | N/O   |
| PI(34:1)                | N/O   | N/O  | 9.53  | 16.20 |
| PI(34:2)                | 15.92 | N/O  | 7.44  | 20.99 |
| PI(34:3)                | N/O   | N/O  | N/O   | 17.29 |
| PI(34:4)                | N/O   | 8.35 | 18.06 | N/O   |
| PI(35:1)                | N/O   | N/O  | 11.42 | 16.96 |
| PI(35:2)                | N/O   | N/O  | 8.02  | 19.31 |
| PI(35:3)                | N/O   | 7.52 | 7.44  | 18.30 |
| PI(35:4)                | N/O   | 8.51 | 8.05  | N/O   |
| PI(36:2)                | N/O   | N/O  | 8.58  | N/O   |
| PI(36:3)                | N/O   | 8.78 | 7.55  | N/O   |
| PI(37:1)                | N/O   | 8.30 | 5.58  | N/O   |
| PI(37:2)                | N/O   | 8.22 | 9.18  | 21.91 |
| PI(37:3)                | N/O   | 7.92 | 8.40  | 19.37 |
| PI(C31)                 | N/O   | 8.43 | 9.63  | N/O   |
| PI(C32)                 | 11.05 | 7.75 | N/O   | 8.25  |
| PI(C33)                 | 15.45 | N/O  | 17.23 | N/O   |



|            |       |      |       |       |
|------------|-------|------|-------|-------|
| PI(C34)    | 15.87 | N/O  | N/O   | N/O   |
| PIM1(32:1) | N/O   | 7.00 | 9.51  | 21.49 |
| PIM1(33:1) | N/O   | 7.12 | 9.54  | N/O   |
| PIM1(34:1) | N/O   | 7.52 | N/O   | N/O   |
| PIM1(34:3) | N/O   | N/O  | N/O   | 18.04 |
| PIM1(34:4) | N/O   | N/O  | N/O   | 16.86 |
| PIM1(35:1) | N/O   | 8.60 | N/O   | N/O   |
| PIM1(35:3) | N/O   | N/O  | 8.14  | N/O   |
| PIM1(36:1) | 10.99 | N/O  | N/O   | N/O   |
| PIM1(36:2) | 10.99 | 8.83 | N/O   | N/O   |
| PIM1(C30)  | 6.22  | N/O  | 9.54  | 20.77 |
| PIM1(C31)  | N/O   | N/O  | 9.73  | N/O   |
| PIM1(C32)  | N/O   | N/O  | N/O   | 12.00 |
| PIM1(C34)  | N/O   | N/O  | N/O   | 21.77 |
| PIM2(32:1) | N/O   | N/O  | N/O   | 19.83 |
| PIM2(33:1) | 5.06  | N/O  | N/O   | N/O   |
| PIM2(33:2) | N/O   | 7.19 | N/O   | N/O   |
| PIM2(34:2) | N/O   | 8.30 | N/O   | N/O   |
| PIM2(34:4) | N/O   | N/O  | N/O   | 22.32 |
| PIM2(35:2) | N/O   | 9.08 | N/O   | N/O   |
| PIM2(35:3) | N/O   | 8.30 | N/O   | N/O   |
| PIM2(35:4) | 6.10  | N/O  | N/O   | N/O   |
| PIM2(36:1) | N/O   | N/O  | 16.05 | N/O   |
| PIM2(36:2) | N/O   | 8.23 | N/O   | N/O   |
| PIM2(37:1) | N/O   | N/O  | 16.23 | N/O   |
| PIM2(37:2) | N/O   | 8.71 | N/O   | N/O   |
| PIM2(37:3) | N/O   | 8.60 | N/O   | N/O   |
| PIM2(C30)  | N/O   | N/O  | 19.40 | N/O   |
| PIM2(C32)  | 10.99 | 7.62 | N/O   | N/O   |
| PIM2(C33)  | 18.01 | N/O  | N/O   | N/O   |

|            |       |      |       |       |
|------------|-------|------|-------|-------|
| PIM2(C34)  | N/O   | 7.85 | 15.98 | N/O   |
| PIM2(C35)  | N/O   | N/O  | N/O   | 6.34  |
| PIM2(C36)  | N/O   | 8.22 | 16.66 | N/O   |
| PIM2(C37)  | 15.91 | N/O  | N/O   | N/O   |
| PIM3(32:2) | N/O   | N/O  | 9.80  | N/O   |
| PIM3(33:2) | N/O   | N/O  | 10.06 | N/O   |
| PIM3(34:1) | N/O   | 3.16 | N/O   | N/O   |
| PIM3(34:2) | N/O   | N/O  | 14.97 | N/O   |
| PIM3(34:3) | N/O   | N/O  | 14.11 | 19.57 |
| PIM3(34:4) | N/O   | N/O  | 6.06  | N/O   |
| PIM3(35:1) | 6.59  | 6.31 | N/O   | N/O   |
| PIM3(35:3) | 16.54 | N/O  | N/O   | 17.82 |
| PIM3(36:1) | 6.32  | 6.92 | N/O   | N/O   |
| PIM3(36:2) | N/O   | N/O  | 7.35  | N/O   |
| PIM3(36:3) | 17.09 | N/O  | 11.55 | 18.69 |
| PIM3(37:1) | 17.52 | 7.35 | 18.42 | 19.38 |
| PIM3(37:2) | 16.79 | N/O  | 16.18 | N/O   |
| PIM3(37:3) | N/O   | N/O  | 15.53 | N/O   |
| PIM3(C30)  | N/O   | 2.43 | N/O   | N/O   |
| PIM3(C31)  | N/O   | N/O  | 16.16 | N/O   |
| PIM3(C32)  | 17.12 | N/O  | N/O   | N/O   |
| PIM3(C34)  | 18.50 | N/O  | N/O   | N/O   |
| PIM3(C36)  | 18.30 | N/O  | 7.42  | 20.68 |
| PIM4(32:2) | N/O   | 9.30 | N/O   | N/O   |
| PIM4(33:1) | 6.49  | N/O  | N/O   | N/O   |
| PIM4(33:2) | N/O   | 8.29 | N/O   | N/O   |
| PIM4(34:1) | 17.63 | 7.50 | N/O   | N/O   |
| PIM4(34:3) | N/O   | 8.14 | N/O   | N/O   |
| PIM4(35:1) | N/O   | 2.96 | 8.40  | N/O   |
| PIM4(35:2) | 16.98 | N/O  | N/O   | N/O   |

|            |       |      |       |       |
|------------|-------|------|-------|-------|
| PIM4(35:4) | N/O   | N/O  | 5.63  | N/O   |
| PIM4(36:1) | N/O   | 7.89 | N/O   | N/O   |
| PIM4(37:1) | N/O   | 7.92 | N/O   | N/O   |
| PIM4(37:3) | 18.52 | N/O  | 17.34 | N/O   |
| PIM4(C31)  | N/O   | 2.31 | N/O   | N/O   |
| PIM4(C32)  | 17.50 | 7.42 | N/O   | N/O   |
| PIM4(C33)  | 17.86 | 7.57 | N/O   | N/O   |
| PIM4(C34)  | N/O   | 7.64 | N/O   | N/O   |
| PIM4(C35)  | N/O   | 8.30 | N/O   | N/O   |
| PIM4(C36)  | N/O   | N/O  | 21.65 | N/O   |
| PIM4(C37)  | N/O   | 8.30 | 10.67 | N/O   |
| PIM5(32:1) | 17.91 | 1.78 | 17.64 | N/O   |
| PIM5(33:1) | 18.89 | N/O  | N/O   | N/O   |
| PIM5(34:2) | N/O   | 7.40 | N/O   | N/O   |
| PIM5(35:2) | N/O   | N/O  | 9.53  | N/O   |
| PIM5(35:4) | N/O   | N/O  | 7.52  | 20.69 |
| PIM5(36:1) | 15.73 | 2.74 | N/O   | N/O   |
| PIM5(36:3) | N/O   | N/O  | 8.60  | N/O   |
| PIM5(37:1) | N/O   | N/O  | 11.05 | N/O   |
| PIM5(37:2) | N/O   | 7.81 | 10.32 | N/O   |
| PIM5(37:3) | N/O   | N/O  | 8.25  | N/O   |
| PIM5(C30)  | 17.86 | 1.65 | N/O   | N/O   |
| PIM5(C31)  | 18.91 | N/O  | N/O   | N/O   |
| PIM5(C32)  | N/O   | 2.21 | N/O   | N/O   |
| PIM5(C33)  | N/O   | N/O  | 18.07 | N/O   |
| PIM5(C34)  | 15.96 | N/O  | N/O   | N/O   |
| PIM6(32:2) | N/O   | N/O  | 7.60  | N/O   |
| PIM6(33:2) | N/O   | 7.89 | 8.23  | N/O   |
| PIM6(34:1) | N/O   | N/O  | 19.46 | N/O   |
| PIM6(34:3) | N/O   | 7.92 | 8.29  | N/O   |

|              |       |       |       |       |
|--------------|-------|-------|-------|-------|
| PIM6(35:1)   | N/O   | N/O   | 19.55 | N/O   |
| PIM6(35:4)   | N/O   | 7.97  | 8.35  | N/O   |
| PIM6(36:1)   | N/O   | 7.35  | N/O   | N/O   |
| PIM6(C31)    | N/O   | N/O   | 8.22  | 20.69 |
| PIM6(C32)    | N/O   | 6.03  | N/O   | N/O   |
| PIM6(C33)    | N/O   | 2.15  | N/O   | N/O   |
| PIM6(C36)    | N/O   | 8.35  | N/O   | N/O   |
| SL-III(C104) | N/O   | N/O   | 12.95 | N/O   |
| SL-III(C106) | N/O   | N/O   | 16.41 | N/O   |
| SL-III(C107) | N/O   | N/O   | 16.48 | N/O   |
| SL-III(C92)  | N/O   | 11.40 | N/O   | N/O   |
| SL-III(C95)  | N/O   | N/O   | 8.40  | N/O   |
| TG(47:3)     | 15.70 | N/O   | N/O   | N/O   |
| TG(52:1)     | N/O   | 10.06 | 17.99 | N/O   |
| TG(52:3)     | N/O   | N/O   | N/O   | 22.33 |
| TG(57:1)     | N/O   | N/O   | N/O   | N/O   |
| TG(58:1)     | N/O   | 10.52 | N/O   | N/O   |
| TG(67:1)     | N/O   | 7.64  | N/O   | N/O   |
| TG(67:2)     | N/O   | N/O   | 4.42  | N/O   |
| TG(67:3)     | N/O   | 11.95 | N/O   | N/O   |
| TG(68:1)     | N/O   | 7.59  | 6.84  | N/O   |
| TG(69:1)     | N/O   | N/O   | 6.59  | N/O   |
| TG(70:1)     | N/O   | 8.14  | N/O   | N/O   |
| TG(70:2)     | N/O   | 7.17  | 6.44  | N/O   |
| TG(72:1)     | N/O   | N/O   | 7.27  | N/O   |
| TG(78:1)     | N/O   | 7.77  | N/O   | N/O   |
| TG(79:1)     | N/O   | 7.92  | N/O   | N/O   |
| TG(80:1)     | N/O   | 8.12  | N/O   | N/O   |
| TG(81:1)     | N/O   | 8.25  | 9.76  | N/O   |
| TG(C53)      | N/O   | N/O   | 17.69 | N/O   |

|                                                     |       |       |       |       |
|-----------------------------------------------------|-------|-------|-------|-------|
| TG(C58)                                             | N/O   | 10.39 | N/O   | N/O   |
| TG(C66)                                             | N/O   | 7.41  | N/O   | N/O   |
| TG(C67)                                             | N/O   | N/O   | N/O   | 21.31 |
| TG(C68)                                             | N/O   | N/O   | 6.81  | N/O   |
| TG(C70)                                             | N/O   | 7.35  | N/O   | N/O   |
| TG(C74)                                             | N/O   | 6.98  | N/O   | N/O   |
| TG(C75)                                             | N/O   | 7.39  | N/O   | N/O   |
| TG(C76)                                             | N/O   | 7.74  | 8.02  | N/O   |
| TG(C77)                                             | N/O   | 7.87  | N/O   | N/O   |
| TG(C78)                                             | N/O   | 8.10  | N/O   | N/O   |
| TG(C81)                                             | N/O   | N/O   | 8.20  | N/O   |
| TG(C82)                                             | N/O   | N/O   | 8.42  | N/O   |
| TG(C85)                                             | 18.06 | N/O   | N/O   | N/O   |
| TG(C86)                                             | 18.32 | N/O   | N/O   | N/O   |
| TMM(Alpha-MA(monoenoic or monocyclopropanoic))(C76) | N/O   | 8.03  | N/O   | N/O   |
| TMM(Alpha-MA(monoenoic or monocyclopropanoic))(C85) | N/O   | N/O   | 16.50 | N/O   |
| TMM(Alpha-MA)(C86)                                  | N/O   | N/O   | 19.58 | N/O   |
| TMM(Alpha-MA)(C87)                                  | N/O   | N/O   | 16.51 | N/O   |
| TMM(keto-MA)(C75)                                   | N/O   | N/O   | 16.58 | N/O   |
| TMM(keto-MA)(C81)                                   | N/O   | N/O   | 15.75 | N/O   |
| TMM(keto-MA)(C86)                                   | N/O   | N/O   | 19.42 | N/O   |
| TMM(keto-MA)(C87)                                   | N/O   | N/O   | 17.23 | N/O   |
| TMM(keto-MA)(C89)                                   | N/O   | N/O   | 16.66 | N/O   |
| TMM(keto-MA)(C90)                                   | N/O   | N/O   | 16.88 | N/O   |
| TMM(keto-MA)(C92)                                   | N/O   | N/O   | 15.17 | N/O   |
| TMM(keto-MA)(C93)                                   | N/O   | N/O   | 17.23 | N/O   |

|                      |     |     |       |     |
|----------------------|-----|-----|-------|-----|
| TMM(keto-MA)(C94)    | N/O | N/O | 17.36 | N/O |
| TMM(methoxy-MA)(C79) | N/O | N/O | 15.73 | N/O |
| TMM(methoxy-MA)(C83) | N/O | N/O | 16.53 | N/O |
| TMM(methoxy-MA)(C84) | N/O | N/O | 16.20 | N/O |
| TMM(methoxy-MA)(C87) | N/O | N/O | 16.66 | N/O |
| TMM(methoxy-MA)(C88) | N/O | N/O | 16.86 | N/O |
| TMM(methoxy-MA)(C90) | N/O | N/O | 17.14 | N/O |
| TMM(methoxy-MA)(C91) | N/O | N/O | 17.19 | N/O |
| TMM(methoxy-MA)(C92) | N/O | N/O | 17.32 | N/O |

<sup>a</sup>LipidID: lipid identifiers from LipidMaps-MtbDB

([https://www.lipidmaps.org/tools/ms/Mtb\\_batch\\_bulk.html](https://www.lipidmaps.org/tools/ms/Mtb_batch_bulk.html)); RT: retention time; N/O: the lipid was not detected by the liquid-chromatography mass spectrometry method listed in **Tables 1** and **2**.

## References

- [1] Y. Huang, A Quality by Design (QbD) Framework for Reversed-Phase Liquid Chromatography Method Development, 2016.
- [2] B.M. Narwate, P.J. Ghule, A.V. Ghule, A.S. Darandale, J.G. Wagh, Ultra Performance Liquid Chromatography: a new revolution in liquid chromatography, International Journal of Pharmaceutics and Drug Analysis 2(1) (2014) 25-34.
- [3] D.R. McCabe, An introduction to UPLC technology improve productivity and data quality, Waters seminars (2007).
- [4] D.R. McCabe, P. Iraneta, T.H. Walter, Reports of the Death of Fully Porous Particles are Greatly Exaggerated, Chromatography today Waters Corporation (2012).
